1 Molecular and physiological responses predict acclimation limits in juvenile brook trout  
2 (*Salvelinus fontinalis*)

3 Theresa E. Mackey<sup>1\*</sup>, Caleb T. Hasler<sup>1#</sup>, Travis Durhack<sup>2,3</sup>, Jennifer D. Jeffrey<sup>2</sup>, Camille J.  
4 Macnaughton<sup>3</sup>, Kimberly Ta<sup>2</sup>, Eva C. Enders<sup>3</sup>, Ken M. Jeffries<sup>2#</sup>

5 <sup>1</sup> University of Winnipeg, Winnipeg, MB, Canada; <sup>2</sup> University of Manitoba, Winnipeg, MB,  
6 Canada; <sup>3</sup> Fisheries and Oceans Canada, Freshwater Institute, Winnipeg, MB, Canada.

7 \*Author of Correspondence: Theresa E. Mackey: [Theresa.Mackey@umanitoba.ca](mailto:Theresa.Mackey@umanitoba.ca)

8 # Authors contributed equally as co-supervisors of the lead author

9

10 Key words: transcriptomics, stress response, metabolic rate, temperature, ectotherm, freshwater  
11 fish

12

13 **Summary statement**

14 Brook trout (*Salvelinus fontinalis*) have a reduced ability to acclimate to temperatures  $\geq 20^{\circ}\text{C}$  as  
15 shown by changes in mRNA abundance, standard metabolic rate, and recovery from exercise  
16 stress.

17

18 **Abstract**

19 Brook trout (*Salvelinus fontinalis*) populations are at risk of exposure to high water temperatures  
20 in the species' native range in eastern North America. We quantified the physiological and  
21 molecular responses of juvenile brook trout to six acclimation temperatures that span the thermal  
22 distribution of the species (5, 10, 15, 20, 23, and  $25^{\circ}\text{C}$ ). Using quantitative PCR (qPCR), we  
23 measured the mRNA transcript abundance of temperature-induced cellular stress genes to  
24 identify a potential sub-lethal temperature threshold for brook trout between  $20\text{--}23^{\circ}\text{C}$ . Brook  
25 trout exhibited an upregulation of stress-related genes (*heat shock protein 90-beta*; *heat shock*  
26 *cognate 71 kDa protein*; *glutathione peroxidase 1*) and a downregulation of transcription factors  
27 and osmoregulation-related genes (*Na<sup>+</sup>/K<sup>+</sup>/2Cl<sup>-</sup> co-transporter-1-a*; *nuclear protein 1*) at  
28 temperatures  $\geq 20^{\circ}\text{C}$ . We also used respirometry to assess the effects of the acclimation  
29 temperatures on oxygen consumption. Standard metabolic rate results indicated that energy  
30 expenditure was higher at temperatures  $\geq 20^{\circ}\text{C}$ . We then examined the effects of acclimation  
31 temperature on metabolic rate and blood plasma parameters in fish exposed to an acute  
32 exhaustive exercise and air exposure stress. Fish acclimated to temperatures  $\geq 20^{\circ}\text{C}$  exhibited  
33 elevated levels of plasma cortisol, muscle lactate, and plasma glucose after exposure to the acute  
34 stressors. After 24 h of recovery, fish showed longer metabolic recovery times at 15 and  $20^{\circ}\text{C}$   
35 and cortisol levels remaining elevated at temperatures  $\geq 20^{\circ}\text{C}$ . Our findings suggest that brook  
36 trout may have a limited ability to acclimate to temperatures  $>20^{\circ}\text{C}$  and increases in  
37 temperatures beyond  $20^{\circ}\text{C}$  may impact brook trout populations.

38

## 39 **Introduction**

40           Climate change is altering thermal habitats of freshwater ectotherms, which can lead to a  
41 shift in species distributions, contribute to disease outbreaks, influence phenology, and decrease  
42 survival (Bassar et al., 2016; Hermoso, 2017; Krabbenhoft et al., 2017). It is estimated that 50%  
43 of freshwater species are threatened by climate change and associated warming temperatures  
44 (Darwall and Freyhof, 2016; Reid et al., 2019). For freshwater fishes, temperature is a ‘master’  
45 abiotic factor and it affects most major physiological and ecological processes (Fry, 1947;  
46 Beitinger and Bennett, 2000; Somero, 2005). Increases in temperature that surpass the  
47 physiological limits of some fishes can lead to extirpation or extinction (Nogués-Bravo et al.,  
48 2018). Fishes differ greatly in their abilities to tolerate temperatures outside their thermal  
49 distribution (Rahel, 2002) and individual fish behaviourally thermoregulate to remain in waters  
50 with ‘preferred’ temperatures (Martins et al., 2011; Cott et al., 2015; Raby et al., 2018), and by  
51 selecting thermally heterogeneous microhabitats (Brett, 1971; Nevermann and Wurtsbough,  
52 1994; Nielsen et al., 1994; Biro, 1998; Newell and Quinn, 2005). Ultimately, if a fish is unable to  
53 leave or acclimate to the temperature of the environment, exposure may lead to mortality.

54           The ability to acclimate to high water temperatures is an adaptive response that can  
55 mitigate against the effects of environmental change (Crozier and Hutchings, 2014). Acclimation  
56 is a reversible phenotypic change caused by exposure to a changing environmental condition  
57 (i.e., temperature) for a period of days to months (Hochachka and Somero, 2002; Havird et al.,  
58 2020). During acclimation, aquatic ectotherms undergo changes in biological processes,  
59 including those at a cellular level, to maintain homeostasis (Schreck and Tort, 2016). These  
60 changes at a cellular level can alter an aquatic ectotherm’s phenotype and potentially allow for  
61 an adaptive response to environmental change (i.e., altered expression of protein isoforms;  
62 Hochachka and Somero, 2002). Additionally, fluctuations in thermal acclimation ability  
63 demonstrate when sub-lethal thresholds begin to have adverse effects on fishes (Komoroske et  
64 al., 2015). Organisms that can acclimate to changing thermal conditions, are likely to contribute  
65 more to future generations, which could affect species at a population level (Schulte, 2014).  
66 Therefore, if aquatic ectotherms can successfully acclimate to warming temperatures, their  
67 populations may tolerate climate change-related temperature increases in their current  
68 distributions.

69 Brook trout (*Salvelinus fontinalis*; Mitchill, 1814) are a predominantly freshwater  
70 salmonid fish species in North America, with some populations facing the threat of extirpation  
71 caused by increases in water temperatures in their native range (Chadwick et al., 2015). Climate  
72 projections show that range losses for brook trout along their southern boundary could reach up  
73 to 49% by 2050 (Meisner, 1990a; Chu et al., 2005; Flebbe et al., 2006). Numerous studies have  
74 suggested that the preferred temperature (i.e., temperature at which fish congregate when placed  
75 within a thermal gradient in the lab) for brook trout is approximately 15°C (e.g., Graham, 1949;  
76 Fry, 1971; Cherry et al., 1977; Stitt et al. 2014), with an upper temperature limiting habitat use of  
77 21–23.5°C in the wild (Meisner, 1990a; Benfey et al., 1997; DeWeber and Wagner, 2015;  
78 Chadwick et al., 2015; Chadwick and McCormick, 2017). Because of the risk of rising  
79 temperatures on some populations of brook trout, a better understanding of the acclimation limits  
80 of this species will aid in predicting the potential effects of future climate change on these  
81 populations.

82 Integrating whole-organism physiology with molecular techniques can help to identify  
83 the ability of a fish to tolerate or acclimate to elevated water temperatures. Whole-organism  
84 oxygen consumption levels, as an estimate of metabolic rate, increase with temperature,  
85 suggesting elevated energetic demands being placed on the organism (Pörtner, 2001, 2002;  
86 Pörtner et al., 2017). Additionally, when fish are exposed to a thermal disturbance or stressor, as  
87 part of the generalized stress response, cortisol, the main glucocorticoid in fish, is released as an  
88 end product of the hypothalamic-pituitary-inter-renal (HPI) axis (Wendelaar Bonga, 1997;  
89 Barton, 2002). Increases in circulating levels of cortisol result in the increased mobilization of  
90 energy resources, such as glucose (Wendelaar Bonga, 1997; Barton, 2002). In response to an  
91 increase in temperature, cellular-level responses also occur and include changes in the expression  
92 of genes responsible for various processes that are necessary to help the fish react to the stressor.  
93 Therefore, transcriptomics can be useful in determining thermal tolerance thresholds of  
94 individuals (Connon et al., 2018) and has contributed to advances in understanding the cellular  
95 processes behind whole-organism physiological responses (Miller et al., 2014; Evans, 2015). For  
96 example, proteins such as heat shock proteins, are useful to measure as an indicator of a response  
97 to a temperature stressor and to monitor acute and chronic changes in the organism. There can be  
98 isoforms of some heat shock proteins that may be continuously expressed over time  
99 (constitutive) and useful to indicate the thermal acclimation response, in addition to isoforms that

100 can be induced as a response to an acute stressor (inducible) where transient increases occur  
101 during an acute response (Iwama et al., 1998). Therefore, changes in the expression of some  
102 genes, as estimated by the abundance of mRNA transcripts, also provides information about the  
103 acute and chronic effects of temperature at the cellular level. Some cellular responses may be  
104 altered or peak prior to detrimental physiological or whole organism changes (Jeffries et al.,  
105 2014; Jeffries et al., 2018), which can help identify sub-lethal thresholds beyond which can lead  
106 to a negative impact on the individual (Connon et al., 2018).

107 In this study, we examined the effects of temperature acclimation on the cellular and  
108 physiological processes in juvenile brook trout to identify sub-lethal thresholds and acclimation  
109 limits for this species. We also examined the effects of acclimation temperature on blood stress  
110 indices and metabolic rate following exposure to acute exhaustive exercise and air exposure  
111 stressors, as well as metabolic rate recovery following the stressor. We tested the hypothesis that  
112 environmental temperature acclimation limits of a species can be predicted by identifying sub-  
113 lethal thresholds at the transcriptome level and the ability to recover from acute stress events.  
114 Previous studies have suggested that temperatures between 20–23°C lead to reduced  
115 physiological performance in brook trout (Smith and Ridgway, 2019; Morrison et al., 2020).  
116 Brook trout in the present study were acclimated for 21 days to one of six different temperatures  
117 (5, 10, 15, 20, 23, and 25°C) that span the thermal distribution of the species. We predicted that  
118 mRNA abundance of transcripts associated with the cellular stress response (i.e., reducing  
119 damage to cellular proteins due to heat stress, preventing damage from reactive oxygen species,  
120 and regulating cell growth) would be elevated when fish are acclimated to temperatures beyond a  
121 sub-lethal threshold (i.e., >20°C in brook trout). Additionally, we predicted that an exhaustive  
122 exercise and air exposure treatment would increase activation of the stress response (i.e., plasma  
123 cortisol, plasma glucose, plasma osmolality, and muscle lactate) at temperatures  $\geq 20^\circ\text{C}$ . Further,  
124 we predicted that metabolic rate would increase with temperature, where those fish exposed to  
125 the higher temperature groups ( $\geq 20^\circ\text{C}$ ) would experience the longest metabolic recovery time  
126 due to increased energetic demands. In this study, we showed that brook trout have a reduced  
127 ability to acclimate to temperatures  $\geq 20^\circ\text{C}$  as supported by changes in mRNA abundance,  
128 standard metabolic rate, and their ability to recover to exercise stress.

129

## 130 **Materials and methods**

131 *Study animals*

132 The juvenile brook trout (mass =  $38.3 \pm 1.7$  g, fork length =  $14.5 \pm 0.2$  cm) used in this study  
133 were first generation (F1) brook trout originally obtained from the Whiteshell Fish Hatchery in  
134 eastern Manitoba, Canada. In 2016, brood stock brook trout were bred at the Fisheries and  
135 Oceans Canada (DFO) Freshwater Institute in Winnipeg, Manitoba, Canada. After hatching  
136 (January 2017) and when past the swim-up stage, fish were moved to one of two aerated 600 l  
137 circular flow-through tanks at approximately 10°C. Fish were fed *ad libitum* with commercial  
138 pellet fish food (EWOS Pacific: Complete Fish Feed for Salmonids, Cargill, Winnipeg,  
139 Manitoba, Canada) for a 35-week rearing period. All methods were approved by the Freshwater  
140 Institute Animal Care Committee (FWI-ACC-AUP-2018-02/2019-02).

141

142 *Temperature treatment*

143 Juvenile brook trout ( $n = 140$ ) were haphazardly netted from the general population tank and  
144 placed into 200 l aerated, flow-through tanks and exposed to one of six temperatures (5, 10, 15,  
145 20, 23, and 25°C;  $n = 50$  per temperature tank) for 21 days. Due to logistic constraints,  
146 temperature exposures were staggered across four months in 2018–19: 10°C beginning on  
147 October 11, 25°C on October 23, 23°C on November 2, 20°C on November 16, 15°C on  
148 December 17, and 5 °C on January 1. On the first day of each temperature treatment, fish were  
149 transferred to a 200 l acclimation tank at 10–11°C and were given 1 day to recover from the  
150 handling stress. The water temperature was then gradually adjusted to the assigned treatment  
151 temperature at a rate of 1.5–2°C day<sup>-1</sup> using heating or cooling coils that were placed in an  
152 auxiliary tank plumbed to the holding tank. Once the treatment temperature was reached, fish  
153 remained at the temperature for a 21-day acclimation period (Beitinger et al., 2000). Throughout  
154 the treatment period, the water temperature of the holding tank was measured using a HOBO  
155 Tidbit v2 Sensor (ONSET Computer Corporation, Bourne, Massachusetts, USA) and controlled  
156 with WitroxCTRL software (Loligo® Systems, Tjele Denmark), where it fluctuated daily by  $\pm$   
157 1.5°C of the treatment temperature to simulate diurnal temperature changes. A 12:12 hour day-  
158 night cycle was used throughout the experiment (65 min of dawn and dusk, full-light starting at  
159 07:05, and full dark at 19:05). Dissolved oxygen was kept above 7 mg l<sup>-1</sup> throughout the  
160 experiment. After the 21-day acclimation period, fish were designated to one of three groups:  
161 “unhandled, acute-stress, or acute-recovery”. Those termed the “unhandled” group were

162 immediately euthanized and sampled (see below;  $n = 10$ ). Those fish in the “acute” groups were  
163 exposed to a chase test and air exposure and either euthanized and sampled 30 min after the  
164 stressor exposure (termed the “acute-stress” group;  $n = 8$ ) or placed in a respirometer for 24 h  
165 and euthanized afterwards (termed the “acute-recovery” group;  $n = 8$ ). Fish from the 25°C group  
166 were not exposed to the full 21-day treatment period, as fish exhibited potential fungal  
167 infections, reduced feeding, and mortality. Therefore, the 25°C treatment group was sampled for  
168 tissues after 11 days (see below) and were not subjected to the acute stress experiments.

169

#### 170 *Tissue sampling of unhandled group*

171 Fish in the unhandled group ( $n = 60$ ;  $n = 10$  per treatment group) were individually euthanized in  
172 a buffered tricaine methanesulfonate solution [MS-222] ( $300\text{mg l}^{-1}$ ; buffered with  $600\text{ mg l}^{-1}$  of  
173 sodium bicarbonate  $\text{NaHCO}_3$ ) with water at the same temperature as their treatment. Fish were  
174 measured for length and body mass prior to tissue sampling. Blood was collected by severing of  
175 the caudal fin and using ammonium-heparinized capillary tubes (Fisherbrand®, Fisher Scientific,  
176 Pittsburgh, Pennsylvania, USA). Whole-blood glucose was immediately measured using a  
177 UltraMini® Glucose Meter (OneTouch®, LifeScan Canada, Burnaby, British Columbia, Canada)  
178 after which blood samples were centrifuged at  $3000 \times g$  for 6 min. Plasma was removed, flash  
179 frozen in liquid nitrogen, and stored at  $-80^\circ\text{C}$  until analysis. The second two gill arches from the  
180 left side of each fish and the liver were sampled and placed in RNAlater™ (Invitrogen™,  
181 Carlsbad, California, USA) and stored at  $4^\circ\text{C}$  overnight prior to storage at  $-80^\circ\text{C}$ . White muscle  
182 was taken from the fish’s right side and placed in liquid nitrogen and stored at  $-80^\circ\text{C}$  for  
183 measurement of muscle lactate.

184

#### 185 *Acute stress and recovery*

186 For the “acute-stress” and “acute-recovery” groups, another subset of fish from each acclimation  
187 temperature, with the exception of the 25°C group (see above), underwent an acute 2 min chase  
188 (e.g., Suski et al., 2006) and 5 min air exposure (e.g., Gingerich et al., 2007) and/or a recovery  
189 trial ( $n = 80$ ;  $n = 8$  per temperature and acute stress group group). The chase test consisted of  
190 placing individual fish into a bucket (diameter  $\approx 17$  in) with 15–20 l of water at the acclimation  
191 temperature. There was a pipe in the centre of the bucket to force the fish to swim around the  
192 perimeter of the container. Once the water was added to the bucket, the bucket was plugged, and

193 the fish was manually chased using a small net. After 2 min, fish were netted out of the water  
194 and air exposed for 5 min. During the air exposure, fish were measured for length and mass.  
195 Following the acute stressor exposure, eight fish were placed into a holding tank at their  
196 acclimation temperature for 30 min to allow plasma cortisol and glucose to reach the putative  
197 peak values (Biron and Benfey, 1994; Benfey and Biron, 2000) before being euthanized and  
198 sampled for blood and white muscle as described above for unhandled individuals.

199 The remaining eight fish were placed in an intermittent-flow respirometry system, in a  
200 water bath held at the same temperature as the acclimation treatment, for 24 h to record oxygen  
201 consumption. Intermittent flow respirometry was used to quantify oxygen consumption as an  
202 estimate of metabolic rate. Oxygen consumption was measured by in-line probes connected to  
203 respirometry chambers (Presence, Regensburg, Germany) and automatically calculated by  
204 AutoResp software (Loligo Systems, Viborg, Denmark). To validate the quality of  
205 measurements,  $r^2$  values for rates of oxygen decline were also automatically generated. Only  $r^2$   
206 values above 0.9 were used for final analysis of standard metabolic rate (SMR) and maximum  
207 metabolic rate (MMR). For SMR calculations, the lowest 20<sup>th</sup> quantile of oxygen consumption  
208 rate ( $\dot{M}O_2$  estimates were used after removing the first 10 h of measurements to ensure fish were  
209 at minimum oxygen consumption levels (Norin and Clark, 2016). Following this, the ‘FishMO2’  
210 package in R (Chabot et al., 2016) was used to analyze  $\dot{M}O_2$  estimates over time including the  
211 calculation of SMR and plotting of  $r^2$  values for each individual at each temperature to include  
212 those with a  $r^2 > 0.9$ . Background respiration from microbial respiration (BOD) was also  
213 estimated by including an empty respirometry chamber in each trial and oxygen consumption  
214 values from these chambers were subtracted from the SMR measurements. MMR was estimated  
215 using a protocol of a 2 min chase test and 5 min air exposure. Three measurements of oxygen  
216 consumption were taken to estimate MMR when each fish was first placed into the respirometry  
217 chamber post exercise and an air exposure event (Norin and Clark, 2016). Aerobic scope (AS)  
218 was calculated by subtracting SMR estimates from MMR for each fish, and recovery time was  
219 determined as the time from when the fish was placed into the respirometer to the time until  
220 metabolic rate first began to stabilize (Cooke et al., 2014).

221

222 *Physiological assays*



223 Blood plasma samples were used to measure cortisol, glucose, and osmolality. Plasma cortisol  
224 levels were quantified using an enzyme-linked immunosorbent assay (ELISA; 1:50 dilution;  
225 Neogen Corporation, Lexington, Kentucky, USA), previously validated for use in other  
226 salmonids (e.g., Jeffries et al., 2012b; Sopinka et al., 2016). The plasma osmolality was  
227 determined using a VAPRO vapour pressure osmometer (Wescor Inc., Logan, Utah, USA).  
228 Plasma glucose was quantified using a hexokinase kinetic glucose assay that was adapted for a  
229 96-well plate (Treberg et al., 2007) where plasma samples were 1:29. Results from the  
230 hexokinase glucose assay were used to develop a correction factor for the whole-blood glucose  
231 levels measured using the UltraMini<sup>®</sup> Glucose Meter (see above). Glucose values from the  
232 hexokinase kinetic assay and the glucose meter were compared using a linear regression and the  
233 resulting equation of the line was used to correct whole-blood values measured with the  
234 handheld meter (Fig. S1).

235 The white muscle was used to determine the amount of muscle lactate. White muscle  
236 samples were first powdered in liquid nitrogen using a mortar and pestle and tissue metabolites  
237 were extracted using an 8% perchloric acid solution mixed with ethylenediaminetetraacetic acid  
238 (EDTA), which was later neutralized using a base solution (mixture of sodium hydroxide,  
239 sodium chloride, and imidazole) to a pH between 7 and 8 (Booth et al. 1995). After metabolite  
240 extraction, lactate concentrations were determined using an enzymatic assay that utilized the  
241 reaction of converting lactate to pyruvate using NAD<sup>+</sup> (nicotinamide adenine dinucleotide) and  
242 lactate dehydrogenase (Lowry and Passonneau, 1972; Gutman and Wahlefeld, 1974).

243

#### 244 *Quantitative PCR*

245 Total RNA was extracted from the gill and liver tissues using a Qiagen RNeasy Plus Mini Kit  
246 (Qiagen, Toronto, ON, CA) following manufacturer's protocols. The RNA samples were  
247 checked for purity (A260/A280, A260/A230) and concentration using a NanoDrop One  
248 Spectrophotometer (ThermoFisher Scientific, Wilmington, DE, USA). The integrity of the RNA  
249 was assessed by electrophoresis on a 1% agarose gel. One µg of total RNA was reverse  
250 transcribed into cDNA using the Qiagen QuantiTect Reverse Transcription Kit (Qiagen,  
251 Valencia, California, USA) following manufacturer's protocols, with the exception that the total  
252 volume was scaled to 32 µl.

253 All forward and reverse quantitative PCR (qPCR) primers (Table 1) were designed using  
254 Primer Express 3.0.1 (Applied Biosystems, ThermoFisher Scientific, Wilmington, DE, USA).  
255 Primers were designed using sequences from the brook trout transcriptome from Sutherland et al.  
256 (2019) (Table S1). Primers were designed for 13 target genes: *Na<sup>+</sup>/K<sup>+</sup>-transporting ATPase*  
257 *subunit alpha-3 (atp1a3)*, *cystic fibrosis transmembrane conductance regulator (cftr)*, *cold-*  
258 *inducible RNA-binding protein (cirbp)*, *glucose-6-phosphatase (g6pc)*, *glutathione peroxidase-*  
259 *like peroxiredoxin (gpx1)*, *ATP-sensitive inward rectifier K<sup>+</sup> channel 8 (irk8)*, *heat shock cognate*  
260 *71 kDA protein (hspa8)*, *heat shock protein 90-beta-1 (hsp90ab1)*, *Na<sup>+</sup>/K<sup>+</sup>/2Cl<sup>-</sup> co-transporter-*  
261 *1-a (nkcc1a)*, *nuclear protein 1 (nupr1)*, *serpin h1 (serpinh1)*, and *B and E 1 subunits of V-type*  
262 *H-ATPase (vatb and vate1)* (Table 1). Primers were designed for three reference genes, *60s*  
263 *ribosomal protein L7 and L8 (rpl7 and rpl8)* and *40s ribosomal protein S9 (rps9)* (Table 1).  
264 Primer efficiencies were tested by generating standard curves using cDNA synthesized from the  
265 RNA pooled from 6 individuals from the treatment groups. Each 12  $\mu$ L qPCR reaction consisted  
266 of 1  $\mu$ L of a 1:10 dilution of cDNA, 500 nM forward and reverse primer, 6  $\mu$ L of PowerUP  
267 SYBR Green Master Mix (Applied Biosystems, Thermo Fisher Scientific, Wilmington, DE,  
268 USA) and 4.8  $\mu$ L RNase-free water. The qPCR reactions were run on a QuantStudio 5 Real-  
269 Time PCR System (Thermo Fisher Scientific, Life Technologies Corporation, Carlsbad,  
270 California USA) in 384 well plates. Target mRNA levels were normalized to the three reference  
271 genes using the  $2^{-\Delta C_t}$  method (Livak and Schmittgen, 2001). The stability of the reference genes  
272 across treatments were confirmed using a pair-wise comparison with BestKeeper Version 1  
273 (Pfaffl et al., 2004).

#### 274 275 *Statistical analysis*

276 To determine whether mass was a significant factor contributing to physiological response  
277 variables (plasma cortisol, plasma glucose, tissue lactate, osmolality), a two-way analysis of  
278 covariance (ANCOVA) was initially run, but mass was shown to have no effect. For metabolic  
279 measurements (SMR and MMR), mass is used in the calculation of these metrics and therefore  
280 mass specific effects are not a factor. Therefore, the effect of acclimation temperature and  
281 treatment (unhandled, acute stress, acute recovery) on the physiological response variables  
282 (plasma cortisol, plasma glucose, tissue lactate, osmolality) were examined using two-way  
283 analyses of variance (ANOVAs) followed by Tukey's honestly significant difference (HSD)

284 post-hoc tests. Assumptions of normality and equal variance were assessed using a Shapiro-Wilk  
285 normality test and a Levene's test, respectively. If assumptions of normality and equal variance  
286 were not met, a generalized linear mixed effects model (glmm; R Core Team, 2019) was used. In  
287 the above analyses our focus included the effects of the exhaustive exercise and air exposure  
288 stressor within an acclimation temperature, this was also the focus of the post-hoc tests  
289 (TukeyHSD or glmm). Therefore, the effects of the stressor within an acclimation temperature  
290 were the interactions we reported.

291 To determine the effect of acclimation temperature on the mRNA abundance and oxygen  
292 consumption parameters (SMR, MMR, time to recovery, and AS), ANOVAs were used followed  
293 by Tukey's HSD post-hoc tests. If data failed to meet the assumptions of the ANOVA (see  
294 above), a Kruskal-Wallis test was run, followed by a Dunn's post-hoc test.

295 All statistical analyses were run in R v.1.2.5033 (R Core Team, 2019). The level of  
296 significance ( $\alpha$ ) was 0.05 when one variable was analyzed (i.e., mRNA abundance). For multiple  
297 comparison tests (i.e., treatment and temperature), a Bonferroni corrected level of significance  
298 was used.

299

## 300 **Results**

### 301 *Chronic temperature exposure effects on mRNA abundance*

302 Gill mRNA abundance differed across acclimation temperatures for genes associated with  
303 thermal and oxidative stress (Fig. 1). The abundance of *nkcc1a* mRNA in the gill of fish held at  
304 23 and 25°C was three-fold lower than at 5 and 10 °C (Fig. 1C; one-way ANOVA;  $F_{(5,59)}$   
305  $= 5.069$ ;  $P < 0.001$ ). The abundance of *gpx1* mRNA was two-fold higher in the gill of fish held at  
306 23 and 25°C compared with temperatures at and below 15°C (Fig. 1A; one-way ANOVA;  $F_{(5,59)}$   
307  $= 5.735$ ;  $P < 0.001$ ). Conversely, the abundance of *hsp90ab1* mRNA was not significantly  
308 elevated in fish gill until the acclimation temperature reached 25°C, with a two-fold increase in  
309 comparison to the three coldest temperature treatments (Fig. 1B; one-way ANOVA;  $F_{(5,59)} =$   
310  $4.321$ ;  $P = 0.002$ ).

311 In liver tissue, the mRNA abundance of five genes displayed significant responses (Fig.  
312 2). The mRNA abundance of heat shock proteins *hspa8* (*hsc70*) and *hsp90ab1* was significantly  
313 elevated in the liver of fish held at 23 and 25°C, with a 4-fold (Fig. 2C; one-way ANOVA;  $F_{(5,59)}$   
314  $= 8.828$ ;  $P < 0.001$ ) and 6-fold increase (Fig. 2D; one-way ANOVA;  $F_{(5,59)} = 15.14$ ;  $P < 0.001$ ),

315 respectively, compared to temperatures at and below 15°C. The mRNA abundance of *gpx1* was  
316 elevated by 4-fold in the liver of fish held at 5°C compared to those held at and above 20°C (Fig.  
317 2B; one-way ANOVA;  $F_{(5,59)} = 4.924$ ;  $P = 0.001$ ). The mRNA abundance of *g6pc* was highest in  
318 the liver of fish held at 20°C and 3-fold higher than those held at 5°C (Fig. 2A; one-way  
319 ANOVA;  $F_{(5,59)} = 3.123$ ;  $P = 0.016$ ). Lastly, *nupr1* mRNA abundance was significantly elevated  
320 by 2-fold in fish held at 20°C compared to 25°C (Fig. 2E; one-way ANOVA;  $F_{(5,59)} = 4.918$ ;  $P =$   
321 0.001).

322

### 323 *Chronic temperature exposure effects on the acute stress response*

324 Chasing followed by an air exposure had a significant effect on physiological variables  
325 associated with the stress response in juvenile brook trout. Regardless of acclimation  
326 temperature, muscle lactate was elevated 30 min following stressor exposure by an average of  
327 1.8 times compared to fish sampled directly out of the acclimation tanks (i.e., unhandled) (Fig.  
328 3A; two-way ANOVA, Treatment  $\times$  Temperature;  $F_{(8)} = 0.513$ ;  $P < 0.001$ ). Muscle lactate levels  
329 significantly returned to or below (for 23°C) pre-stressed levels following 24 h of recovery  
330 across all acclimation temperatures, except at 5°C, where lactate levels were not significantly  
331 different from pre- or post-stress levels. Fish held at 23°C exhibited the lowest muscle lactate  
332 level after 24 h of recovery from the stressor ( $6.2 \mu\text{mol g}^{-1} \pm 0.8$ ).

333 Acclimation temperatures also had a significant effect on both the plasma cortisol and  
334 glucose response to an acute stressor. For fish exposed to colder temperatures (5 and 10°C),  
335 exposure to the acute stressor had no significant effect on either plasma cortisol (Fig. 3C) or  
336 glucose (Fig. 3B) levels 30 min post-stressor exposure or following 24 h of recovery. However,  
337 fish exposed to warmer temperatures (15, 20, and 23°C) exhibited significantly elevated plasma  
338 cortisol and glucose levels following stressor exposure. Plasma cortisol levels remained elevated  
339 24 h post-stressor exposure in these fish exposed to warmer temperatures (two-way ANOVA,  
340 Treatment  $\times$  Temperature;  $F_{(8)} = 4.31$ ;  $P = 0.001$ ). Plasma glucose levels returned to pre-stressed  
341 levels (i.e., unhandled) following 24 h of recovery for fish held at 20 and 23°C, but not for those  
342 held at 15°C (two-way ANOVA, Treatment  $\times$  Temperature;  $F_{(8)} = 6.929$ ;  $P < 0.001$ ).

343 Similarly, plasma osmolality did not differ significantly among groups (i.e., unhandled,  
344 acute-stress, acute-recovery) for fish held at colder acclimation temperatures (5 and 10°C; Fig.  
345 3D; Table 2). Plasma osmolality increased by approximately 1.1 and 1.2-fold in response to

346 stressor exposure for fish exposed to 15°C and 20°C, respectively (Table 2). At 23°C, fish had  
347 significantly lower plasma osmolality 24 h post-stressor exposure, but levels did not differ  
348 significantly between the unhandled fish and fish exposed to the acute stressor (Table 2).

349

### 350 *Chronic temperature exposure effects on metabolic rate*

351 Standard metabolic rate of juvenile brook trout was unaffected until acclimation temperatures  
352 reached 20°C (Fig. 4A; Kruskal-Wallis;  $\chi^2_{(4,40)} = 30.43$ ;  $P < 0.001$ ). Fish SMR was further  
353 increased by approximately 1.4-times in fish held at 23°C compared to 20°C. Maximum  
354 metabolic rate was highest in juvenile brook trout held at 23°C and lowest for fish held at 5°C  
355 (Fig. 4B; one-way ANOVA;  $F_{(4,40)} = 8.84$ ;  $P < 0.001$ ). Aerobic scope was not significantly  
356 affected by acclimation temperature (Fig. 4D; one-way ANOVA;  $F_{(4,40)} = 1.29$ ;  $P = 0.292$ ).  
357 Recovery time was approximately twice as long for fish exposed to 5, 15, and 20°C compared to  
358 10 and 23°C (Fig. 4C; one-way ANOVA;  $F_{(4,40)} = 27.69$ ;  $P < 0.001$ ).

359

## 360 **Discussion**

361 Our study assessed the ability of juvenile brook trout to acclimate to temperatures that  
362 span the thermal distribution of the species. It was evident that the physiology of juvenile brook  
363 trout was impacted at acclimation temperatures  $\geq 20^\circ\text{C}$ , as indicated by the mRNA transcript  
364 levels of genes associated with chronic thermal stress. Transcripts involved in heat stress and  
365 regulatory responses (i.e., *hsp90ab1*, *hspa8*, *gpx1*, *nkcc1a* and *nupr1*) exhibited differential  
366 abundance at 20°C and higher suggesting a thermal threshold at the transcript level. Elevated  
367 levels of plasma cortisol and glucose after the exhaustive exercise and air exposure stressor,  
368 suggests increased activation of the HPI axis at 20°C and higher. Increases in muscle lactate also  
369 suggests increased anaerobic metabolic processes at 20°C and higher. Additionally, standard  
370 metabolic rate was higher at elevated temperatures (20°C), and fish experienced extended  
371 recovery times at high acclimation temperatures (15 and 20°C), indicating a more pronounced  
372 response to the acute stressor at elevated temperatures. Overall, the ability for juvenile brook  
373 trout to acclimate for 3 weeks to temperatures beyond 20°C appears to be reduced.

374

### 375 *Cellular-level response to chronic temperature exposure*

376 Juvenile brook trout at temperatures above 20°C showed a cellular heat shock response in gill  
377 and liver tissues. Heat shock proteins are part of a ‘classic’ temperature-induced cellular stress  
378 response and play a critical role in reducing and repairing damage to cellular proteins that arises  
379 from physical or chemical stress (Iwama et al., 1998; Somero, 2010; Currie, 2011). When  
380 temperatures begin to approach a species’ thermal limit, heat shock protein expression is often  
381 increased (Currie, 2011). In the present study, both *hsp90ab1* and *hspa8* (*hsc70*) mRNA levels  
382 were significantly elevated at 23 and 25°C compared to temperatures  $\leq 15^\circ\text{C}$ . Similarly, in the gill  
383 tissue there was a significant increase in abundance of *hsp90ab1* mRNA at 25°C compared to  
384 temperatures  $\leq 15^\circ\text{C}$ . Other salmonid species such as, arctic char (*Salvelinus alpinus*), sockeye  
385 salmon (*Oncorhynchus nerka*), and pink salmon (*O. gorbuscha*), have had elevated mRNA  
386 levels of *hsp90ab1* and *hspa8* at temperatures  $\geq 19^\circ\text{C}$  (Quinn et al., 2011; Jeffries et al., 2012a,  
387 2014; Akbarzadeh et al., 2018). As both *hsp90ab1* and *hspa8* are constitutive isoforms (Iwama et  
388 al., 1998), changes in their expression would be expected in chronic events such as thermal  
389 acclimation, and our results further suggest that brook trout are activating a chronic cellular  
390 stress response above 20°C as evidenced by increased mRNA abundance at these temperatures.

391 As temperature surpassed 20°C, an apparent thermal threshold was reached for genes  
392 involved in the oxidative stress response in gill and liver tissues. Glutathione peroxidase 1 is  
393 responsible for catalyzing the reduction of  $\text{H}_2\text{O}_2$  into  $\text{H}_2\text{O}$  or alcohol and thereby prevents  
394 damage caused by reactive oxygen species (ROS; Sattin et al., 2015). As metabolic rate increases  
395 with temperature, there is an increase in oxidative phosphorylation in the mitochondria,  
396 potentially resulting in elevated production of ROS (Davidson and Shiestl, 2001). The SMR of  
397 brook trout increased significantly with temperature in the present study, potentially resulting in  
398 elevated ROS production, and thus may be responsible for the increase in abundance of *gpx1*  
399 mRNA observed in the gill at temperatures above 20°C. In contrast, a significant increase in the  
400 abundance of *gpx1* mRNA in the liver was observed at cooler temperatures (i.e., 5 and 10°C)  
401 compared to fish held at 20°C. Multiple Antarctic fishes (e.g., *Champscephalus gunnari*,  
402 *Chaenocephalus aceratus*, *Pseudchaenichthys georgianus*, *Dissostichus eleginoides*, and  
403 *Notothenia rossi*) have exhibited increased glutathione peroxidase activity in the heart and liver  
404 tissues compared to the gills and muscle tissues (Ansaldo et al. 2000). An increase of glutathione  
405 peroxidase in the liver may be due to the dependence of aerobic metabolism on the oxidation of  
406 unsaturated fats in the liver, fats that are susceptible to oxygen radical attack (Roberfroid and

407 Calderon, 1995). Previous work on this same group of brook trout found that hepatosomatic  
408 index (comparison of liver mass to body mass) was lowest at 23 and 25°C and higher at cooler  
409 temperatures (5°C), indicating a higher fat content at cooler temperatures (Morrison et al., 2020).  
410 The relationship between higher fat content in the liver and higher ROS attack is supported by  
411 results from Morrison et al. (2020) and may explain why liver tissue exhibited increased  
412 abundance of *gpx1* mRNA in our study. Overall, *gpx1* mRNA abundance differed across gill and  
413 liver tissue where increased abundance was observed at warmer temperatures for the gill tissue in  
414 contrast to increased abundance at cooler temperatures for the liver tissue.

415 The mRNA abundance of genes involved in cellular processes, such as cell growth, and  
416 metabolic processes (e.g., glycogen production), exhibited peak abundance levels at 20°C, levels  
417 that subsequently decreased at higher temperatures. Because some cellular responses can exhibit  
418 a peak near or prior to detrimental physiological changes, the peak mRNA transcript levels at  
419 20°C may suggest that it is near a sub-lethal threshold. Nuclear protein 1 is involved in the  
420 regulation of cell growth and apoptosis (Mallo et al., 1997) and plays a role as a transcription  
421 factor (Momoda et al., 2007). The *nupr1* mRNA abundance in the liver was highest in juvenile  
422 brook trout held at 20°C, and then decreased by 2-fold in fish held at 25°C in the present study.  
423 This decline in *nupr1* mRNA abundance in fish held at 25°C compared to 15 and 20°C suggests  
424 a potential sub-lethal threshold for *nupr1* at temperatures above 20°C. Additionally, higher  
425 mortality rates were observed in fish held at 25°C, further supporting the shutdown of certain  
426 cellular processes at temperatures beyond 23°C. This increased abundance of mRNA at 20°C  
427 was also observed for liver *g6pc*, which plays a role in glycogen metabolism, where levels  
428 peaked at 20°C. Therefore, elevation of *nupr1* and *g6pc* abundance at 20°C and decreased  
429 abundance at 25°C is consistent with a shift in the cellular processes being activated at the  
430 highest acclimation treatments.

431

#### 432 *Whole-animal responses to chronic temperature exposure*

433 The acclimation temperature affected the ability of the juvenile brook trout to mount a stress  
434 response to an acute stressor. Plasma cortisol levels typically increase in fish between 30–60 min  
435 following exposure to an acute stressor (Biron and Benfey, 1994; Benfey and Biron, 2000),  
436 which can lead to gluconeogenesis, thereby elevating levels of plasma glucose (Wendelaar  
437 Bonga, 1997). In our study, the cortisol response to an acute stressor was impaired or delayed in

438 fish exposed to lower temperatures (5 and 10°C), as there was no apparent increase in plasma  
439 cortisol levels 30 min following stressor exposure (acute-stress group) or after 24 h of recovery  
440 (acute-recovery group). Similarly, there was no change in plasma glucose levels in response to  
441 the acute stressor in fish held at 5 and 10°C. In other studies, peak plasma cortisol levels for fish  
442 exposed to lower temperatures were also significantly delayed, possibly due to reduced  
443 enzymatic activity at cold temperatures (Van Ham et al., 2003; Louison et al., 2017).  
444 Conversely, plasma cortisol levels were significantly elevated 30 min post-exposure to the  
445 exhaustive exercise and air exposure stressor in fish held at temperatures  $\geq 15^\circ\text{C}$ . Notably, plasma  
446 cortisol levels did not return to pre-stress levels (i.e., unhandled group) 24 h post-stressor  
447 exposure (20 and 23°C), suggesting that the fish had not fully recovered from the stressor at the  
448 higher temperatures. Plasma glucose levels showed similar increases post-stressor exposure in  
449 fish held at temperatures  $\geq 15^\circ\text{C}$ , with the exception that glucose levels returned to pre-stress  
450 levels for fish acclimated to 20 and 23°C. This pattern of significantly elevated circulating  
451 cortisol levels at higher temperatures post-exposure to an exhaustive exercise stressor has been  
452 displayed in several other studies (e.g., Jain and Farrell, 2003; Suski et al., 2003; Meka and  
453 McCormick, 2005; Suski et al., 2006; McLean et al., 2016). For example, rainbow trout  
454 (*Oncorhynchus mykiss*) in southwest Alaska that were angled during a warmer year compared  
455 with a cooler year (13.2°C vs. 9.8°C, respectively) exhibited significantly increased plasma  
456 cortisol concentrations post-angling event (Meka and McCormick, 2005). Our data suggests that  
457 at higher temperatures, especially post-stressor exposure, there was an elevated stress response in  
458 brook trout demonstrated by increased plasma cortisol and glucose. However, possibly due to  
459 enzymatic properties, it is unclear if there was sufficient time for plasma cortisol and glucose to  
460 reach peak values at the cooler temperatures (5 and 10°C).

461 Lactate is a by-product of anaerobic metabolism and increased concentrations of lactate  
462 in the white muscle of fish can be caused by extensive exercise and activity (Wood et al., 1983).  
463 Across all acclimation temperatures, the exhaustive exercise and air exposure stressor led to a  
464 significant transient increase in lactate in the white muscle 30 min post-stressor exposure, that  
465 returned to or below pre-stress (i.e., unhandled) levels 24 h later. Several studies on a range of  
466 fishes, including brook trout, have demonstrated increased muscle lactate or plasma lactate  
467 concentrations when fish were exposed to exercise and air exposure (Beggs et al., 1980;  
468 Ferguson and Tufts, 1992; Booth et al., 1995; Milligan, 1996; Farrell et al., 2001; Kieffer et al.,



469 2011; Landsman et al., 2011). Interestingly, our results showed a decrease in muscle lactate  
470 below pre-stress levels after 24 h recovery in fish held at 23°C group. A decrease in muscle  
471 lactate can be caused by a release of lactate into the blood or because the lactate in the muscle is  
472 recycled *in situ* for glycogenesis (Milligan and Wood, 1986; Milligan and Girard, 1993; Kieffer  
473 et al., 1994; Milligan, 1996). Therefore, the observed decrease in muscle lactate after 24 h  
474 recovery in the 23°C group may be a result of its release into the blood stream or recycling  
475 through glycogenesis to help the fish return its energy stores to pre-stress levels. Our results  
476 suggest that the exhaustive exercise and air exposure induced anaerobic respiration as exhibited  
477 by the increase in muscle lactate across all temperature groups.

478 We found some evidence that osmoregulation in brook trout was impacted at elevated  
479 temperatures as shown by increased levels of plasma osmolality and changes in mRNA  
480 abundance of *nkcc1a*. Plasma osmolality can estimate the osmoregulatory ability of fishes as an  
481 indicator of ion balance, particularly for circulating concentrations of Na<sup>+</sup> and Cl<sup>-</sup> (McDonald  
482 and Milligan, 1997). For the brook trout that were exposed to the exhaustive exercise and air  
483 exposure stressor, we observed a significant transient increase in plasma osmolality 30 min post-  
484 stressor exposure that returned to pre-stress levels (i.e., unhandled) in fish held at 15 and 20°C.  
485 After exposure to an acute stressor, increased cardiac output would lead to increased blood  
486 perfusion at the gill (Mazeaud and Mazeaud, 1981; Sopinka et al., 2016). However, there is a  
487 trade-off between improving oxygen uptake at the expense of increasing permeability to water  
488 and ions, termed the osmorepiratory compromise (Randall et al., 1972; Nilsson, 2007;  
489 Onukwufor and Wood, 2018). This compromise may aid in explaining why there was no  
490 increase in osmolality in the acute-stress group at 23°C but there was a decline 24 h later. At a  
491 molecular level, *nkcc1a*, a gene involved in ion regulation showed increased mRNA abundance  
492 in the gill at low temperatures, with decreased abundance at higher temperatures. Because the  
493 Na<sup>+</sup>-K-Cl<sup>-</sup> cotransporter is involved in active ion absorption or secretion across cellular  
494 membranes in gills (Hiroi et al., 2008), this may further suggest that brook trout osmoregulatory  
495 ability was potentially impacted by increased temperatures.

496 Both SMR and MMR changed with acclimation temperature, but AS was not  
497 significantly affected in juvenile brook trout. The SMR and MMR increased with temperature,  
498 with the highest levels evident in fish held at 23°C. There is a strong positive relationship of  
499 water temperature on metabolic rate in ectotherms (Fry, 1971; Hulbert and Else, 2004; Brett,

1964; Beamish, 1978), therefore increased SMR at higher temperatures was expected in brook trout. Likely due to the nearly parallel increase in SMR and MMR, AS was not significantly affected by acclimation temperature. Stable AS values were also observed in Nile perch (*Lates niloticus*) that were acclimated for three weeks at 27, 29, and 31°C (Nyboer and Chapman, 2017). A similar trend of stable AS across temperatures has also been observed in Chinook salmon (*O. tshawytscha*, Poletto et al., 2017) and pink salmon (*O. gorbuscha*, Clark et al., 2011). The maintenance of similar AS in fish acclimated to different temperatures may be evidence for metabolic compensation (Donelson and Munday, 2012). If the energy available to allocate to other processes (AS) remains constant, the body may have to adjust and metabolically compensate to maintain energy, oxygen, heart rate, and other vital processes (Eliason and Farrell, 2016). Overall, our metabolic data reflects an increase in metabolic activity at higher temperatures with possible metabolic compensation as indicated by constant AS across all temperatures.

Time to recovery was highest at 15 and 20°C, while 23°C displayed the lowest recovery time of all groups. The fish acclimated to 23°C exhibited the shortest recovery time, despite having the highest SMR and evidence of cellular impairment. This short recovery time at 23°C does not seem to be due to this group having a higher SMR, as the AS between all groups across the study was not significantly different. Considering the constant AS across groups it is possible that this quick recovery time in the 23°C may be due to respiratory alkalosis and metabolic suppression. Metabolic rate depression has been a strategy used by other animals to combat adverse environmental conditions (Hochachka and Guppy, 1987). For example, goldfish (*Carassius auratus*) can suppress their metabolism up to 30% of the aerobic metabolic rate at elevated environmental temperatures (Van Waversveld et al., 1988). Post exhaustive exercise and air exposure, may lead to elevated blood CO<sub>2</sub> levels and lower blood pH (Wang et al., 1994; Milligan, 1996) and this can be exacerbated at high temperatures. Metabolic suppression may also be used to limit further carbon dioxide build up in the blood (acidosis) to regulate the blood pH of fishes (Claiborne, 1998). Therefore, it is possible that the short recovery time in the fish from the 23°C acclimation group could be attributed to metabolic suppression.

*Conclusion*

530 We demonstrated that the acclimation ability of brook trout to temperatures  $\geq 20^{\circ}\text{C}$  is  
531 impaired as shown by changes in mRNA transcript abundance, standard metabolic rate, and  
532 responses to exhaustive exercise and air exposure. These findings are consistent with previous  
533 work that suggested that upper temperatures limiting habitat use in brook trout is around 21–  
534  $23.5^{\circ}\text{C}$  (reviewed in Smith and Ridgway 2019). Our study indicated that there is a sub-lethal  
535 threshold between  $20\text{--}23^{\circ}\text{C}$  that shows when chronic temperatures may begin to adversely  
536 impact the physiological performance of brook trout. Previous work on this same group of brook  
537 trout also showed a sub-lethal threshold between  $20\text{--}23^{\circ}\text{C}$  as fish were no longer able to increase  
538 their critical thermal maxima with acclimation temperature and there was increased plasma  
539 lactate levels indicating anaerobic metabolism (Morrison et al. 2020). Furthermore, Chadwick  
540 and McCormick (2017) demonstrated that brook trout growth is limited by higher temperatures  
541 especially those above  $23^{\circ}\text{C}$ , and that may play a role in driving their distribution. Collectively,  
542 these studies in combination with the present study suggest that there is a limitation to the ability  
543 of brook trout to cope with chronic temperatures  $\geq 20^{\circ}\text{C}$ , which can potentially provide a  
544 benchmark for understanding the ability of some brook trout populations to persist in the wild in  
545 the future.

## 546 **Acknowledgments**

547 We thank Andrew Chapelsky, Scott Morrison, and Jamie Card for assisting with the experiments  
548 and Kerry Wautier for assistance in rearing of the fish. Thank you to Dr. Gary Anderson for the  
549 use of his laboratory for osmolality analyses and Alex Schoen for help with the glucose assay.

## 550 **Competing Interests**

551 No competing interests declared.

## 552 **Funding**

553 This research was funded by a Natural Sciences and Engineering Research Council of Canada  
554 (NSERC) Discovery Grant awarded to K.M.J. (grant number 05479). Work by C.T.H. was

555 supported by the University of Winnipeg and Fisheries and Oceans Canada. T.E.M was  
556 supported by a Research Manitoba M.Sc. Studentship.

557 **References**

558

559 **Akbarzadeh, A., Günther, O. P., Houde, A. L., Li, S., Ming, T. J., Jeffries, K. M., Hinch, S.**  
560 **G. and Miller, K. M.** (2018). Developing specific molecular biomarkers for thermal stress in  
561 salmonids. *BMC Genomics* **19**, 749.

562 **Ansaldo, M., Luquet, C. M., Evelson, P. A., Polo, J. M. and Llesuy, S.** (2000). Antioxidant  
563 levels from different Antarctic fish caught around South Georgia Island and Shag Rocks. *Polar*  
564 *Biology* **23**, 160–165.

565 **Barton, B. A.** (2002). Stress in fishes: a diversity of responses with particular reference to  
566 changes in circulating corticosteroids. *Integrative and Comparative Biology* **42**, 517–525.

567 **Barton, B. A. and Iwama, G. K.** (1991). Physiological changes in fish from stress in  
568 aquaculture with emphasis on the response and effects of corticosteroids. *Annual Review of Fish*  
569 *Diseases* **1**, 3–26.

570 **Bassar, R. D., Letcher, B. H., Nislow, K. H. and Whiteley, A. R.** (2016). Changes in seasonal  
571 climate outpace compensatory density-dependence in eastern brook trout. *Global Change*  
572 *Biology* **22**, 577–593.

573 **Beamish, F. W. H.** (1978). Swimming capacity. In *Fish Physiology* (ed. Hoar, W. S.) and  
574 Randall, D. J.), pp. 101–187. New York, New York: Academic Press.

575 **Beggs, G. L., Holeton, G. F. and Grossman, E. J.** (1980). Some physiological consequences of  
576 angling stress in muskellunge, *Esox masquinongy* Mitchill. *Journal of Fish Biology* **17**, 649–659.

577 **Beitinger, T. L. and Bennett, W. A.** (2000). Quantification of the role of acclimation  
578 temperature in temperature tolerance of fishes. *Environmental Biology of Fishes* **58**, 277–288.

579 **Beitinger, T. L., Bennett, W. A. and McCauley, R. W.** (2000). Temperature tolerances of  
580 North American freshwater fishes exposed to dynamic changes in temperature. *Environmental*  
581 *Biology of Fishes* **58**, 237–275.

582 **Benfey, T. J. and Biron, M.** (2000). Acute stress response in triploid rainbow trout  
583 (*Oncorhynchus mykiss*) and brook trout (*Salvelinus fontinalis*). *Aquaculture* **184**, 167–176.

584 **Benfey, T. J., McCabe, L. E. and Pepin, P.** (1997). Critical thermal maxima of diploid and  
585 triploid brook charr, *Salvelinus fontinalis*. *Environmental Biology of Fishes* **49**, 259–264.

- 586 **Biro, P. A.** (1998). Staying cool: behavioral thermoregulation during summer by young-of-year  
587 brook trout in a lake. *Transactions of the American Fisheries Society* **127**, 212–222.
- 588 **Biron, M. and Benfey, T. J.** (1994). Cortisol, glucose and hematocrit changes during acute  
589 stress, cohort sampling, and the diel cycle in diploid and triploid brook trout (*Salvelinus*  
590 *fontinalis* Mitchell). *Fish physiology and Biochemistry* **13**, 153.
- 591 **Booth, R. K., Kieffer, J. D., Tufts, B. L., Davidson, K. and Bielak, A. T.** (1995). Effects of  
592 late-season catch and release angling on anaerobic metabolism, acid–base status, survival, and  
593 gamete viability in wild Atlantic salmon (*Salmo salar*). *Canadian Journal of Fisheries and*  
594 *Aquatic Sciences* **52**, 283–290.
- 595 **Brett, J. R.** (1964). The respiratory metabolism and swimming performance of young sockeye  
596 salmon. *Journal of the Fisheries Board of Canada* **21**, 1183–1226.
- 597 **Brett, J. R.** (1971). Energetic responses of salmon to temperature. A study of some thermal  
598 relations in the physiology and freshwater ecology of sockeye salmon (*Oncorhynchus nerka*).  
599 *American Zoologist* **11**, 99–113.
- 600 **Chabot, D., Steffensen, J. F. and Farrell, A. P.** (2016). The determination of standard  
601 metabolic rate in fishes. *Journal of Fish Biology* **88**, 81–121.
- 602 **Chadwick, J. G. and McCormick, S. D.** (2017). Upper thermal limits of growth in brook trout  
603 and their relationship to stress physiology. *The Journal of Experimental Biology* **220**, 3976–  
604 3987.
- 605 **Chadwick, J. G., Nislow, K. H. and McCormick, S. D.** (2015). Thermal onset of cellular and  
606 endocrine stress responses correspond to ecological limits in brook trout, an iconic cold-water  
607 fish. *Conservation Physiology* **3**, cov017.
- 608 **Cherry, D. S., Dickson, K. L., Cairns Jr, J. and Stauffer, J. R.** (1977). Preferred, avoided, and  
609 lethal temperatures of fish during rising temperature conditions. *Journal of the Fisheries Board*  
610 *of Canada* **34**, 239–246.
- 611 **Chu, C., Mandrak, N. E. and Minns, C. K.** (2005). Potential impacts of climate change on the  
612 distributions of several common and rare freshwater fishes in Canada. *Diversity and*  
613 *Distributions* **11**, 299–310.
- 614 **Claiborne, J. B.** (1998). Acid-base regulation. In *The Physiology of Fishes* (ed. Evans, D. H.),  
615 pp. 171–198. Boca Raton, Florida: CRC Press.

- 616 **Clark, T. D., Jeffries, K. M., Hinch, S. G. and Farrell, A. P.** (2011). Exceptional aerobic  
617 scope and cardiovascular performance of pink salmon (*Oncorhynchus gorbuscha*) may underlie  
618 resilience in a warming climate. *Journal of Experimental Biology* **214**, 3074–3081.
- 619 **Connon, R. E., Jeffries, K. M., Komoroske, L. M., Todgham, A. E. and Fanguie, N. A.**  
620 (2018). The utility of transcriptomics in fish conservation. *Journal of Experimental Biology* **221**,  
621 jeb148833.
- 622 **Conolly, R. B. and Lutz, W. K.** (2004). Nonmonotonic dose-response relationships:  
623 Mechanistic basis, kinetic modeling, and implications for risk assessment. *Toxicological*  
624 *Sciences* **77**, 151–157.
- 625 **Cooke, S. J., Messmer, V., Tobin, A. J., Pratchett, M. S. and Clark, T. D.** (2014). Refuge-  
626 seeking impairments mirror metabolic recovery following fisheries-related stressors in the  
627 Spanish flag snapper (*Lutjanus carponotatus*) on the Great Barrier Reef. *Physiological and*  
628 *Biochemical Zoology* **87**, 136–147.
- 629 **Cott, P. A., Guzzo, M. M., Chapelsky, A. J., Milne, S. W. and Blanchfield, P. J.** (2015). Diel  
630 bank migration of Burbot (*Lota lota*). *Hydrobiologia* **757**, 3–20.
- 631 **Crozier, L. G. and Hutchings, J. A.** (2014). Plastic and evolutionary responses to climate  
632 change in fish. *Evolutionary Applications* **7**, 68–87.
- 633 **Currie, S.** (2011). Temperature: Heat shock proteins and temperature. In *Encyclopedia of Fish*  
634 *Physiology From Genome to Environment* (ed. Farrell, A. P.), pp. 1732–1737. Elsevier:  
635 Academic Press.
- 636 **Darwall, W. R. and Freyhof, J.** (2016). Lost fishes, who is counting? The extent of the threat to  
637 freshwater fish biodiversity. *Conservation of Freshwater Fishes* 1–36.
- 638 **Davidson, J. F. and Schiestl, R. H.** (2001). Mitochondrial respiratory electron carriers are  
639 involved in oxidative stress during eat stress in *Saccharomyces cerevisiae*. *Molecular and*  
640 *Cellular Biology* **21**, 8483.
- 641 **DeWeber, J. T. and Wagner, T.** (2015). Predicting brook trout occurrence in stream reaches  
642 throughout their native range in the eastern United States. *Transactions of the American*  
643 *Fisheries Society* **144**, 11–24.
- 644 **Donelson, J. M. and Munday, P. L.** (2012). Thermal sensitivity does not determine acclimation  
645 capacity for a tropical reef fish. *Journal of Animal Ecology* **81**, 1126–1131.

- 646 **Eliason, E. J. and Farrell, A. P.** (2016). Oxygen uptake in Pacific salmon *Oncorhynchus* spp.:  
647 when ecology and physiology meet. *Journal of Fish Biology* **88**, 359–388.
- 648 **Evans, T. G.** (2015). Considerations for the use of transcriptomics in identifying the ‘genes that  
649 matter’ for environmental adaptation. *Journal of Experimental Biology* **218**, 1925–1935.
- 650 **Farrell, A. P., Gallagher, P. E., Fraser, J., Pike, D., Bowering, P., Hadwin, A. K.,**  
651 **Parkhouse, W. and Routledge, R.** (2001). Successful recovery of the physiological status of  
652 coho salmon on board a commercial gillnet vessel by means of a newly designed revival box.  
653 *Canadian Journal of Fisheries and Aquatic Sciences* **58**, 1932–1946.
- 654 **Ferguson, R. A. and Tufts, B. L.** (1992). Physiological effects of brief air exposure in  
655 exhaustively exercised rainbow trout (*Oncorhynchus mykiss*): Implications for “catch and  
656 release” fisheries. *Canadian Journal of Fisheries and Aquatic Sciences* **49**, 1157–1162.
- 657 **Flebbe, P. A., Roghair, L. D. and Bruggink, J. L.** (2006). Spatial Modeling to Project  
658 Southern Appalachian Trout Distribution in a Warmer Climate. *Transactions of the American*  
659 *Fisheries Society* **135**, 1371–1382.
- 660 **Fry, F. E. J.** (1947). Effects of the environment on animal activity. University of Toronto  
661 Studies, Biological No. 68. *Publication of the Ontario Fisheries Research Laboratory* **55**, 1–52.
- 662 **Fry, F. E. J.** (1971). The effect of environmental factors on the physiology of fish. In  
663 *Environmental Relations and Behavior* (ed. Hoar, W. S.) and Randall, D. J.), pp. 1–98. New  
664 York, New York: Academic Press.
- 665 **Graham, J. M.** (1949). Some effects of temperature and oxygen pressure on the metabolism and  
666 activity of the speckled trout, *Salvelinus fontinalis*. *Canadian Journal of Research* **27d**, 270–  
667 288.
- 668 **Gutman, I. and Wahlefeld, A. W.** (1974). L(-)-Malate determination with malate  
669 dehydrogenase and NAD. In *Methods of Enzymatic Analysis*, pp. 1585–1589. New York, New  
670 York: Academic Press.
- 671 **Havird, J. C., Neuwald, J. L., Shah, A. A., Mauro, A., Marshall, C. A. and Ghalambor, C.**  
672 **K.** (2020). Distinguishing between active plasticity due to thermal acclimation and passive  
673 plasticity due to Q10 effects: Why methodology matters. *Functional Ecology* **34**, 1015–1028.
- 674 **Hermoso, V.** (2017). Freshwater ecosystems could become the biggest losers of the Paris  
675 Agreement. *Global Change Biology* **23**, 3433–3436.



- 676 **Hiroi, J., Yasumasu, S., McCormick, S. D., Hwang, P.-P. and Kaneko, T.** (2008). Evidence  
677 for an apical Na–Cl cotransporter involved in ion uptake in a teleost fish. *Journal of*  
678 *Experimental Biology* **211**, 2584.
- 679 **Hochachka, P. W. and Guppy, M.** (1987). *Metabolic Arrest and the Control of Biological*  
680 *Time*. Cambridge, MA and London, England: Harvard University Press.
- 681 **Hochachka, P. W. and Somero, G. N.** (2002). *Biochemical Adaptation: Mechanism and*  
682 *Process in Physiological Evolution*. New York, New York: Oxford University Press.
- 683 **Hulbert, A. J. and Else, P. L.** (2004). Basal metabolic rate: History, composition, regulation,  
684 and usefulness. *Physiological and Biochemical Zoology* **77**, 869–876.
- 685 **Iwama, G. K., Thomas, P. T., Forsyth, R. B. and Vijayan, M. M.** (1998). Heat shock protein  
686 expression in fish. *Reviews in Fish Biology and Fisheries* **8**, 35–56.
- 687 **Jain, K. E. and Farrell, A. P.** (2003). Influence of seasonal temperature on the repeat  
688 swimming performance of rainbow trout *Oncorhynchus mykiss*. *Journal of Experimental Biology*  
689 **206**, 3569.
- 690 **Jeffries, K. M., Hinch, S. G., Martins, E. G., Clark, T. D., Lotto, A. G., Patterson, D. A.,**  
691 **Cooke, S. J., Farrell, A. P. and Miller, K. M.** (2012a). Sex and proximity to reproductive  
692 maturity influence the survival, final maturation, and blood physiology of Pacific salmon when  
693 exposed to high temperature during a simulated migration. *Physiological and Biochemical*  
694 *Zoology* **85**, 62–73.
- 695 **Jeffries, K. M., Hinch, S. G., Sierocinski, T., Clark, T. D., Eliason, E. J., Donaldson, M. R.,**  
696 **Li, S., Pavlidis, P. and Miller, K. M.** (2012b). Consequences of high temperatures and  
697 premature mortality on the transcriptome and blood physiology of wild adult sockeye salmon  
698 (*Oncorhynchus nerka*). *Ecology and Evolution* **2**, 1747–1764.
- 699 **Jeffries, K. M., Hinch, S. G., Sierocinski, T., Pavlidis, P. and Miller, K. M.** (2014).  
700 Transcriptomic responses to high water temperature in two species of Pacific salmon.  
701 *Evolutionary Applications* **7**, 286–300.
- 702 **Jeffries, K., Komoroske, L., Truong, J., Werner, I., Hasenbein, M., Hasenbein, S., Fangué,**  
703 **N. and Connon, R.** (2015). The transcriptome-wide effects of exposure to a pyrethroid pesticide  
704 on the Critically Endangered delta smelt *Hypomesus transpacificus*. *Endangered Species*  
705 *Research* **28**, 43–60.

- 706 **Jeffries, K. M., Fangue, N. A. and Connon, R. E.** (2018). Multiple sub-lethal thresholds for  
707 cellular responses to thermal stressors in an estuarine fish. *Comparative Biochemistry and*  
708 *Physiology Part A: Molecular & Integrative Physiology* **225**, 33–45.
- 709 **Kieffer, J., Currie, S. and Tufts, B.** (1994). Effects of environmental temperature on the  
710 metabolic and acid-base responses of rainbow trout to exhaustive exercise. *Journal of*  
711 *Experimental Biology* **194**, 299–317.
- 712 **Kieffer, J. D., Kassie, R. S. and Taylor, S. G.** (2011). The effects of low-speed swimming  
713 following exhaustive exercise on metabolic recovery and swimming performance in brook trout  
714 (*Salvelinus fontinalis*). *Physiological and Biochemical Zoology* **84**, 385–393.
- 715 **Komoroske, L. M., Connon, R. E., Jeffries, K. M. and Fangue, N. A.** (2015). Linking  
716 transcriptional responses to organismal tolerance reveals mechanisms of thermal sensitivity in a  
717 mesothermal endangered fish. *Molecular Ecology* **24**, 4960–4981.
- 718 **Krabbenhoft, T. J., Platania, S. P. and Turner, T. F.** (2014). Interannual variation in  
719 reproductive phenology in a riverine fish assemblage: implications for predicting the effects of  
720 climate change and altered flow regimes. *Freshwater Biology* **59**, 1744–1754.
- 721 **Landsman, S. J., Wachelka, H. J., Suski, C. D. and Cooke, S. J.** (2011). Evaluation of the  
722 physiology, behaviour, and survival of adult muskellunge (*Esox masquinongy*) captured and  
723 released by specialized anglers. *Fisheries Research* **110**, 377–386.
- 724 **Livak, K. J. and Schmittgen, T. D.** (2001). Analysis of relative gene expression data using real-  
725 time quantitative PCR and the  $2^{-\Delta\Delta CT}$  Method. *Methods* **25**, 402–408.
- 726 **Louison, M. J., Hasler, C. T., Fenske, M. M., Suski, C. D. and Stein, J. A.** (2017).  
727 Physiological effects of ice-angling capture and handling on northern pike, *Esox lucius*. *Fisheries*  
728 *Management and Ecology* **24**, 10–18.
- 729 **Lowry, O. H. and Passonneau, J. V.** (1972). Pyridine nucleotides. In *A Flexible System of*  
730 *Enzymatic Analysis*, pp. 13–20. New York, New York: Academic Press.
- 731 **Mallo, G. V., Rechreche, H., Frigerio, J.-M., Rocha, D., Zweibaum, A., Lacasa, M., Jordan,**  
732 **B. R., Dusetti, N. J., Dagorn, J.-C. and Iovanna, J. L.** (1997). Molecular cloning, sequencing  
733 and expression of the mRNA encoding human Cdx1 and Cdx2 homeobox. Down-regulation of  
734 Cdx1 and Cdx2 mRNA expression during colorectal carcinogenesis. *International Journal of*  
735 *Cancer* **74**, 35–44.

736 **Martins, E. G., Hinch, S. G., Patterson, D. A., Hague, M. J., Cooke, S. J., Miller, K. M.,**  
737 **Lapointe, M. F., English, K. K. and Farrell, A. P.** (2011). Effects of river temperature and  
738 climate warming on stock-specific survival of adult migrating Fraser River sockeye salmon  
739 (*Oncorhynchus nerka*). *Global Change Biology* **17**, 99–114.

740 **Mazeaud, M. M. and Mazeaud, F.** (1981). Adrenergic responses to stress in fish. In *Stress and*  
741 *fish* (ed. Pickering, A. D.), pp. 49–75. London, England: Academic.

742 **McDonald, G. and Milligan, L.** (1997). Ionic, osmotic and acid-base regulation in stress. *Fish*  
743 *Stress and Health in Aquaculture* **62**, 119–145.

744 **McLean, M. F., Hanson, K. C., Cooke, S. J., Hinch, S. G., Patterson, D. A., Nettles, T. L.,**  
745 **Litvak, M. K. and Crossin, G. T.** (2016). Physiological stress response, reflex impairment and  
746 delayed mortality of white sturgeon *Acipenser transmontanus* exposed to simulated fisheries  
747 stressors. *Conservation Physiology* **4**.

748 **Meisner, J. D.** (1990). Effect of climatic warming on the southern margins of the native range of  
749 brook trout, *Salvelinus fontinalis*. *Canadian Journal of Fisheries and Aquatic Sciences* **47**, 1065–  
750 1070.

751 **Meka, J. M. and McCormick, S. D.** (2005). Physiological response of wild rainbow trout to  
752 angling: impact of angling duration, fish size, body condition, and temperature. *Fisheries*  
753 *Research* **72**, 311–322.

754 **Miller, K. M., Teffer, A., Tucker, S., Li, S., Schulze, A. D., Trudel, M., Juanes, F., Tabata,**  
755 **A., Kaukinen, K. H., Ginther, N. G., et al.** (2014). Infectious disease, shifting climates, and  
756 opportunistic predators: cumulative factors potentially impacting wild salmon declines.  
757 *Evolutionary Applications* **7**, 812–855.

758 **Milligan, C. L.** (1996). Metabolic recovery from exhaustive exercise in rainbow trout.  
759 *Comparative Biochemistry and Physiology Part A: Physiology* **113**, 51–60.

760 **Milligan, C. L. and Girard, S. S.** (1993). Lactate metabolism in rainbow trout. *Journal of*  
761 *Experimental Biology* **180**, 175–193.

762 **Milligan, C. L. and Wood, C. M.** (1986). Tissue intracellular acid-base status and the fate of  
763 lactate after exhaustive exercise in the rainbow trout. *Journal of Experimental Biology* **123**, 123–  
764 144.

- 765 **Mommsen, T. P., Vijayan, M. M. and Moon, T. W.** (1999). Cortisol in teleosts: dynamics,  
766 mechanisms of action, and metabolic regulation. *Reviews in Fish Biology and Fisheries* **9**, 211–  
767 268.
- 768 **Momoda, T. S., Schwindt, A. R., Feist, G. W., Gerwick, L., Bayne, C. J. and Schreck, C. B.**  
769 (2007). Gene expression in the liver of rainbow trout, *Oncorhynchus mykiss*, during the stress  
770 response. *Comparative Biochemistry and Physiology Part D: Genomics and Proteomics* **2**, 303–  
771 315.
- 772 **Morrison, S. M., Mackey, T. E., Durhack, T., Jeffrey, J. D., Wiens, L. M., Mochnacz, N. J.,**  
773 **Hasler, C. T., Enders, E. C., Treberg, J. R. and Jeffries, K. M.** Sub-lethal temperature  
774 thresholds indicate acclimation and physiological limits in brook trout *Salvelinus fontinalis*.  
775 *Journal of Fish Biology*.
- 776 **Neverman, D. and Wurtsbaugh, W. A.** (1994). The thermoregulatory function of diel vertical  
777 migration for a juvenile fish, *Cottus extensus*. *Oecologia* **98**, 247–256.
- 778 **Newell, J. C. and Quinn, T. P.** (2005). Behavioral thermoregulation by maturing adult sockeye  
779 salmon (*Oncorhynchus nerka*) in a stratified lake prior to spawning. *Canadian Journal of*  
780 *Zoology* **83**, 1232–1239.
- 781 **Nielsen, J. L., Lisle, T. E. and Ozaki, V.** (1994). Thermally stratified pools and their use by  
782 steelhead in northern California streams. *Transactions of the American Fisheries Society* **123**,  
783 613–626.
- 784 **Nilsson, G. E.** (2007). Gill remodeling in fish—a new fashion or an ancient secret? *Journal of*  
785 *Experimental Biology* **210**, 2403–2409.
- 786 **Nogués-Bravo, D., Rodríguez-Sánchez, F., Orsini, L., De Boer, E., Jansson, R., Morlon, H.,**  
787 **Fordham, D. A. and Jackson, S. T.** (2018). Cracking the code of biodiversity responses to past  
788 climate change. *Trends in Ecology & Evolution* **33**, 765–776.
- 789 **Norin, T. and Clark, T. D.** (2016). Measurement and relevance of maximum metabolic rate in  
790 fishes. *Journal of Fish Biology* **88**, 122–151.
- 791 **Nyboer, E. A. and Chapman, L. J.** (2017). Elevated temperature and acclimation time affect  
792 metabolic performance in the heavily exploited Nile perch of Lake Victoria. *The Journal of*  
793 *Experimental Biology* **220**, 3782–3793.
- 794 **Onukwufor, J. O. and Wood, C. M.** (2018). The osmorepiratory compromise in rainbow trout  
795 (*Oncorhynchus mykiss*): the effects of fish size, hypoxia, temperature and strenuous exercise on

796 gill diffusive water fluxes and sodium net loss rates. *Comparative Biochemistry and Physiology*  
797 *Part A: Molecular & Integrative Physiology* **219**, 10–18.

798 **Parmesan, C.** (2006). Ecological and evolutionary responses to recent climate change. *Annual*  
799 *Review of Ecology, Evolution, and Systematics* **37**, 637–669.

800 **Pfaffl, M. W., Tichopad, A., Prgomet, C. and Neuvians, T. P.** (2004). Determination of stable  
801 housekeeping genes, differentially regulated target genes and sample integrity: BestKeeper–  
802 Excel-based tool using pair-wise correlations. *Biotechnology Letters* **26**, 509–515.

803 **Podrabsky, J. E. and Somero, G. N.** (2004). Changes in gene expression associated with  
804 acclimation to constant temperatures and fluctuating daily temperatures in an annual killifish  
805 *Austrofundulus limnaeus*. *Journal of Experimental Biology* **207**, 2237.

806 **Poletto, J. B., Cocherell, D. E., Baird, S. E., Nguyen, T. X., Cabrera-Stagno, V., Farrell, A.**  
807 **P. and Fangue, N. A.** (2017). Unusual aerobic performance at high temperatures in juvenile  
808 Chinook salmon, *Oncorhynchus tshawytscha*. *Conservation Physiology* **5**.

809 **Pörtner, H.-O.** (2001). Climate change and temperature-dependent biogeography: oxygen  
810 limitation of thermal tolerance in animals. *Naturwissenschaften* **88**, 137–146.

811 **Pörtner, H.-O.** (2002). Climate variations and the physiological basis of temperature dependent  
812 biogeography: systemic to molecular hierarchy of thermal tolerance in animals. *Comparative*  
813 *Biochemistry and Physiology Part A: Molecular & Integrative Physiology* **132**, 739–761.

814 **Pörtner, H.-O., Bock, C. and Mark, F. C.** (2017). Oxygen- and capacity-limited thermal  
815 tolerance: bridging ecology and physiology. *Journal of Experimental Biology* **220**, 2685–2696.

816 **Quinn, N. L., McGowan, C. R., Cooper, G. A., Koop, B. F. and Davidson, W. S.** (2011).  
817 Ribosomal genes and heat shock proteins as putative markers for chronic, sublethal heat stress in  
818 Arctic charr: applications for aquaculture and wild fish. *Physiological Genomics* **43**, 1056–1064.

819 **Raby, G. D., Vandergoot, C. S., Hayden, T. A., Faust, M. D., Kraus, R. T., Dettmers, J. M.,**  
820 **Cooke, S. J., Zhao, Y., Fisk, A. T. and Krueger, C. C.** (2018). Does behavioural  
821 thermoregulation underlie seasonal movements in Lake Erie walleye? *Canadian Journal of*  
822 *Fisheries and Aquatic Sciences* **75**, 488–496.

823 **R Core Team.** (2019). R: A Language and Environment for Statistical Computing. Foundation  
824 for Statistical Computing, Vienna, Austria.

- 825 **Rahel, F. J.** (2002). Using current biogeographic limits to predict fish distributions following  
826 climate change. In *American Fisheries Society Symposium*, pp. 99–112. Bethesda, MD, USA:  
827 American Fisheries Society.
- 828 **Randall, D. J., Baumgarten, D. and Malyusz, M.** (1972). The relationship between gas and ion  
829 transfer across the gills of fishes. *Comparative Biochemistry and Physiology Part A: Physiology*  
830 **41**, 629–637.
- 831 **Reid, A. J., Carlson, A. K., Creed, I. F., Eliason, E. J., Gell, P. A., Johnson, P. T., Kidd, K.**  
832 **A., MacCormack, T. J., Olden, J. D. and Ormerod, S. J.** (2019). Emerging threats and  
833 persistent conservation challenges for freshwater biodiversity. *Biological Reviews* **94**, 849–873.
- 834 **Roberfroid, M. B. and Calderon, P. B.** (1995). *Free Radicals and Oxidation Phenomena in*  
835 *Biological Systems*. New York, New York: Dekker.
- 836 **Sattin, G., Bakiu, R., Tolomeo, A. M., Carraro, A., Coppola, D., Ferro, D., Patarnello, T.**  
837 **and Santovito, G.** (2015). Characterization and expression of a new cytoplasmic glutathione  
838 peroxidase 1 gene in the Antarctic fish *Trematomus bernacchii*. *Hydrobiologia* **761**, 363–372.
- 839 **Schreck, C. B. and Tort, L.** (2016). The concept of stress in fish. In *Biology of Stress in Fish*  
840 (ed. Schreck, C. B.), Tort, L.), Farrell, A. P.), and Brauner, C. J.), pp. 1–34. London, England:  
841 Academic Press.
- 842 **Schulte, P. M.** (2014). What is environmental stress? Insights from fish living in a variable  
843 environment. *Journal of Experimental Biology* **217**, 23–34.
- 844 **Smith, D. A. and Ridgway, M. S.** (2019). Temperature selection in brook charr: lab  
845 experiments, field studies, and matching the Fry curve. *Hydrobiologia* **840**, 143–156.
- 846 **Somero, G. N.** (2005). Linking biogeography to physiology: Evolutionary and acclimatory  
847 adjustments of thermal limits. *Frontiers in Zoology* **2**, 1.
- 848 **Somero, G. N.** (2010). The physiology of climate change: how potentials for acclimatization and  
849 genetic adaptation will determine ‘winners’ and ‘losers.’ *Journal of Experimental Biology* **213**,  
850 912–920.
- 851 **Sopinka, N. M., Donaldson, M. R., O’Connor, C. M., Suski, C. D. and Cooke, S. J.** (2016).  
852 Stress indicators in fish. In *Biology of Stress in Fish* (ed. Schreck, C. B.), Tort, L.), Farrell, A.  
853 P.), and Brauner, C. J.), pp. 405–462. New York, New York: Academic Press.

854 **Sopinka, N. M., Jeffrey, J. D., Burnett, N. J., Patterson, D. A., Gilmour, K. M. and Hinch,**  
855 **S. G.** (2017). Maternal programming of offspring hypothalamic–pituitary–interrenal axis in wild  
856 sockeye salmon (*Oncorhynchus nerka*). *General and comparative endocrinology* **242**, 30–37.

857 **Stitt, B. C., Burness, G., Burgomaster, K. A., Currie, S., McDermid, J. L. and Wilson, C. C.**  
858 (2014). Intraspecific variation in thermal tolerance and acclimation capacity in brook trout  
859 (*Salvelinus fontinalis*): physiological implications for climate change. *Physiological and*  
860 *Biochemical Zoology* **87**, 15–29.

861 **Suski, C. D., Killen, S. S., Morrissey, M. B., Lund, S. G. and Tufts, B. L.** (2003).  
862 Physiological changes in largemouth bass caused by live-release angling tournaments in  
863 southeastern Ontario. *North American Journal of Fisheries Management* **23**, 760–769.

864 **Suski, C. D., Killen, S. S., Kieffer, J. D. and Tufts, B. L.** (2006). The influence of  
865 environmental temperature and oxygen concentration on the recovery of largemouth bass from  
866 exercise: implications for live–release angling tournaments. *Journal of Fish Biology* **68**, 120–  
867 136.

868 **Treberg, J. R., MacCormack, T. J., Lewis, J. M., Almeida-Val, V. M., Val, A. L. and**  
869 **Driedzic, W. R.** (2007). Intracellular glucose and binding of hexokinase and  
870 phosphofructokinase to particulate fractions increase under hypoxia in heart of the amazonian  
871 armored catfish (*Liposarcus pardalis*). *Physiological and Biochemical Zoology* **80**, 542–550.

872 **Van Ham, E. H., Berntssen, M. H. G., Imsland, A. K., Parpoura, A. C., Wendelaar Bonga,**  
873 **S. E. and Stefansson, S. O.** (2003). The influence of temperature and ration on growth, feed  
874 conversion, body composition and nutrient retention of juvenile turbot (*Scophthalmus maximus*).  
875 *Aquaculture* **217**, 547–558.

876 **Van Waversveld, J., Addink, A., Van den Thillart, G. and Smit, H.** (1988). Direct  
877 calorimetry on free swimming goldfish at different oxygen levels. *Journal of Thermal Analysis*  
878 *and Calorimetry* **33.4**, 1019–1026.

879 **Wang, Y., Heigenhauser, G. J. and Wood, C. M.** (1994). Integrated responses to exhaustive  
880 exercise and recovery in rainbow trout white muscle: acid-base, phosphogen, carbohydrate, lipid,  
881 ammonia, fluid volume and electrolyte metabolism. *Journal of Experimental Biology* **195**, 227–  
882 258.

883 **Wendelaar Bonga, S. E.** (1997). The stress response in fish. *Physiological Reviews* **77**, 591–  
884 625.

885 **Wood, C. M., Turner, J. D. and Graham, M. S.** (1983). Why do fish die after severe exercise?  
886 *Journal of Fish Biology* **22**, 189–201.  
887  
888



## 889 **Figure Legends**

890 **Figure 1. Transcript abundance of thermal stress biomarkers in gill tissue for juvenile**  
891 **brook trout (*Salvelinus fontinalis*) held at temperatures spanning their thermal distribution**  
892 **(*n* = 8–10).** Fish were held for 21 days at the respective acclimation temperature, with the  
893 exception of fish held at 25°C, where fish were sampled after 11 days (see text for details).  
894 Groups that do not share a letter are significantly different from one another (one-way ANOVA,  
895  $P < 0.05$ ; see Table S2). Horizontal bars in the boxplot represent the median response value and  
896 the 75 and 25% quartiles. Whiskers represent  $\pm 1.5$  times the interquartile range, and each dot  
897 represents an individual response value. *gpx1*, *glutathione peroxidase-like peroxiredoxin*;  
898 *hsp90ab1*, *heat shock protein 90-beta-1*; *nkcc1a*, *Na<sup>+</sup>/K<sup>+</sup>/2Cl<sup>-</sup> co-transporter-1-a*.

899  
900 **Figure 2. Transcript abundance of thermal stress biomarkers in liver tissue for juvenile**  
901 **brook trout (*Salvelinus fontinalis*) held at temperatures spanning their thermal distribution**  
902 **(*n* = 8–10).** Fish were held for 21 days at the respective acclimation temperature, with the  
903 exception of fish held at 25°C, where fish were sampled after 11 days (see text for details).  
904 Groups that do not share a letter are significantly different from one another (one-way ANOVA,  
905  $P < 0.05$ ; see Table S2). Horizontal bars in the boxplot represent the median response value and  
906 the 75 and 25% quartiles. Whiskers represent  $\pm 1.5$  times the interquartile range, and each dot  
907 represents an individual response value. *g6pc*, *glucose-6-phosphatase*; *gpx1*, *glutathione*  
908 *peroxidase-like peroxiredoxin*; *hspa8*, *heat shock cognate 71 kDA protein*; *hsp90ab1*, *heat shock*  
909 *protein 90-beta-1*; *nupr1*, *nuclear protein 1*.

910 **Figure 3. Physiological parameters collected from juvenile brook trout (*Salvelinus***  
911 ***fontinalis*) held at temperatures spanning their thermal distribution for 21 days.** Muscle  
912 lactate (A), plasma glucose (B), plasma cortisol (C), and plasma osmolality (D) were measured  
913 in fish directly sampled from the acclimation tank (unhandled;  $n = 10$ ), 30 min (acute-stress,  $n =$   
914 8) and 24 h (acute-recovery;  $n = 8$ ) after exposure to an acute stressor, consisting of 3 min of  
915 chasing and 5 min of air exposure. Within an acclimation temperature, groups that do not share  
916 a letter are significantly different from one another. For muscle lactate, plasma glucose and  
917 plasma cortisol, data were analyzed using a two-way ANOVA ( $P < 0.05$ ; see Table S3). Plasma

918 osmolality was analyzed using a glmm ( $P < 0.05$ ; see Table 2). Horizontal bars in the boxplot  
919 represent the median response value and the 75 and 25% quartiles. Whiskers represent  $\pm 1.5$   
920 times the interquartile range, and each dot represents an individual response value.

921

922 **Figure 4. Metabolic and recovery parameters collected from juvenile brook trout**  
923 **(*Salvelinus fontinalis*) held at temperatures spanning their thermal distribution ( $n = 8$ ).**

924 Standard metabolic rate (SMR; A), maximum metabolic rate (MMR; B), recovery time in hours  
925 post stress events (C), and aerobic scope (AS; D). Groups that do not share a letter are  
926 significantly different from one another (Kruskal-Wallis [SMR only], one-way ANOVA,  $P <$   
927  $0.05$ ; see Table S3). Horizontal bars in the boxplot represent the median response value and the  
928 75 and 25% quartiles. Whiskers represent  $\pm 1.5$  times the interquartile range, and each dot  
929 represents an individual response value.

930 **Table 1.** Primer sequences for quantitative PCR in brook trout (*Salvelinus fontinalis*).

| Gene            | Function                                                                             | Primer Sequence (5'–3')                               | Product size (bp) | Eff. (%)                           |
|-----------------|--------------------------------------------------------------------------------------|-------------------------------------------------------|-------------------|------------------------------------|
| <i>atp1a3</i>   | Na <sup>+</sup> /K <sup>+</sup> regulation                                           | F: TCCTGGCCTACGGAATCCA<br>R: GAGCACAACACCCAGGTACAAA   | 74                | 96 <sup>G</sup>                    |
| <i>cfr</i>      | Chloride transporter                                                                 | F: TCAAACAACGCCCCGATAC<br>R: CAACCTGACCACCACTGAGGTA   | 75                | 96 <sup>G</sup>                    |
| <i>cirbp</i>    | RNA stabilization involved in osmotic stress and cold shock response                 | F: AGGTATGGGCAGGCAATCTG<br>R: AAGAGGGAGGGCAAGACAAAA   | 73                | 101 <sup>G</sup>                   |
| <i>g6pc</i>     | Glycogen metabolism                                                                  | F: CACTTCCCTCACCAGGTTGT<br>R: TCCATTGGACCCGGTCAAAG    | 76                | 111 <sup>L</sup>                   |
| <i>gpx1</i>     | Oxidative stress response, involved in cell immunity                                 | F: CGTTCTTGCAGTTCTCCTGATG<br>R: ACCGACAAGGGTCTCGTGAT  | 70                | 90 <sup>G</sup> ; 91 <sup>L</sup>  |
| <i>hspa8</i>    | Heat shock protein, regulatory role in autophagy                                     | F: GGGTTCATGGCAACCTGATT<br>R: ACGTTGCCTTCACTGACTCTGA  | 67                | 91 <sup>G</sup> ; 94 <sup>L</sup>  |
| <i>hsp90ab1</i> | Heat shock protein, role in cell response to stress and buffer against cell mutation | F: CAACATGGAGCGCATCATG<br>R: CAGGTGTTTCTTGGCCATCA     | 79                | 93 <sup>G</sup> ; 97 <sup>L</sup>  |
| <i>irk8</i>     | ATP-sensitive inward rectifier K <sup>+</sup> channel 8                              | F: CCCTGTTCTCGGATGTTCTTG<br>R: GGTGAACAAAGCACGCTTCA   | 72                | 87 <sup>G</sup>                    |
| <i>nkcc1a</i>   | Ion regulation                                                                       | F: CGGGAATTGTTCTCTCCTGTGT<br>R: GCAATCGCTGAGGTCGAAA   | 82                | 101 <sup>G</sup>                   |
| <i>nupr1</i>    | Cell growth and apoptosis regulator                                                  | F: TGGCCTTCTTTTCAGTGTTCTG<br>R: GGAAGCCAGCGACAATACCA  | 89                | 96 <sup>L</sup>                    |
| <i>rpl7</i>     | Reference gene ribosomal protein L7                                                  | F: TCTGACGCAGACGCATGAG<br>R: CGAAACTGGCCTTCGTCATC     | 86                | 88 <sup>G</sup> ; 95 <sup>L</sup>  |
| <i>rpl8</i>     | Reference gene ribosomal protein L8                                                  | F: GCCACAGTCATCTCCCACAA<br>R: GGAGCCAGAGGGAAGCTTAAC   | 63                | 96 <sup>G</sup> ; 91 <sup>L</sup>  |
| <i>rps9</i>     | Reference gene ribosomal protein S9                                                  | F: GAGTTGGGTTTGTGCGAAGAC<br>R: CCTGGTCGAGACGAGACTTCTC | 68                | 85 <sup>G</sup> ; 100 <sup>L</sup> |
| <i>serpinh1</i> | Biosynthesis of collagen and role in restoration of homeostasis                      | F: CCCAAGCTGTTCTACGCTGA<br>R: AGTCTGCCGAGGAAGAGGAT    | 83                | 92 <sup>G</sup> ; 92 <sup>L</sup>  |

|              |                                       |                                                      |    |                  |
|--------------|---------------------------------------|------------------------------------------------------|----|------------------|
| <i>vatB</i>  | Regulation of H <sup>+</sup> gradient | F: GCTTCAGCATTCTTTGGGAAA<br>R: TCAGGGCCCTTATGACAACAG | 89 | 104 <sup>G</sup> |
| <i>vatE1</i> | Regulation of H <sup>+</sup> gradient | F: GGCTGGGTCCTTGGCTATGT<br>R: GGTGTTAAAGGCTCGCGACG   | 85 | 97 <sup>G</sup>  |

---

931 <sup>L</sup> denotes liver

932 <sup>G</sup> denotes gill

933 Forward and reverse primer sequences are indicated by “F” and “R”, respectively

934 *atp1a3*, Na<sup>+</sup>/K<sup>+</sup>-transporting ATPase subunit alpha-3; *cfr*, cystic fibrosis transmembrane conductance regulator; *cirbp*, cold-

935 *inducible RNA-binding protein*; *g6pc*, glucose-6-phosphatase; *gpx1*, glutathione peroxidase-like peroxiredoxin; *irk8*, ATP-sensitive

936 *inward rectifier K<sup>+</sup> channel 8*; *hspa8*, heat shock cognate 71 kDA protein; *hsp90ab1*, heat shock protein 90-beta-1; *nkcc1a*,

937 Na<sup>+</sup>/K<sup>+</sup>/2Cl<sup>-</sup> co-transporter-1-a; *nupr1*, nuclear protein 1; *vatb*, V-type H-ATPase B; *vate1*, V-type H-ATPase E1; *rpl7*, 60s ribosomal

938 *protein L7*; *rpl8*, 60s ribosomal protein L8; *rps9*, 40s ribosomal protein S9.

939 **Table 2.** Results of the generalized linear model for plasma osmolality of juvenile brook trout  
 940 (*Salvelinus fontinalis*) acclimated to five temperatures (5, 10, 15, 20, and 23°C) and exposed to  
 941 one of three treatments (unhandled, acute stress, and acute-stress recovery).

| <b>Coefficients</b>                          | <b>Estimate</b> | <b>Std. Error</b> | <b>T value</b> | <b>P value</b> |
|----------------------------------------------|-----------------|-------------------|----------------|----------------|
| Intercept                                    | 0.0030          | 0.0000            | 64.96          | < <b>0.001</b> |
| Treatment Acute-Recovery                     | 0.0000          | 0.0000            | 1.201          | 0.232          |
| Treatment Acute-Stress                       | 0.0000          | 0.0000            | 0.491          | 0.624          |
| Temperature 10                               | -0.0000         | 0.0000            | -0.921         | 0.359          |
| Temperature 15                               | 0.0002          | 0.0000            | 3.043          | <b>0.003</b>   |
| Temperature 20                               | 0.0002          | 0.0000            | 3.601          | < <b>0.001</b> |
| Temperature 23                               | 0.0000          | 0.0000            | 0.254          | 0.799          |
| Treatment Acute-Recovery ×<br>Temperature 10 | 0.0001          | 0.0001            | 1.359          | 0.177          |
| Treatment Acute-Stress ×<br>Temperature 10   | -0.0000         | 0.0000            | -0.834         | 0.406          |
| Treatment Acute-Recovery ×<br>Temperature 15 | -0.0000         | 0.0001            | -0.629         | 0.530          |
| Treatment Acute-Stress ×<br>Temperature 15   | -0.0004         | 0.0001            | -3.611         | < <b>0.001</b> |
| Treatment Acute-Recovery ×<br>Temperature 20 | -0.0001         | 0.0001            | -1.099         | 0.274          |
| Treatment Acute-Stress ×<br>Temperature 20   | -0.0005         | 0.0001            | -5.055         | < <b>0.001</b> |
| Treatment Acute-Recovery ×<br>Temperature 23 | 0.0003          | 0.0001            | 2.630          | <b>0.010</b>   |
| Treatment Acute-Stress ×<br>Temperature 23   | -0.0000         | 0.0001            | -0.723         | 0.471          |

942 Coefficients denote the groups being compared (i.e., treatment group × temperature); significant  
 943 *P*-values are represented as bolded text

944  
945  
946  
947  
948  
949  
950  
951  
952  
953  
954  
955  
956

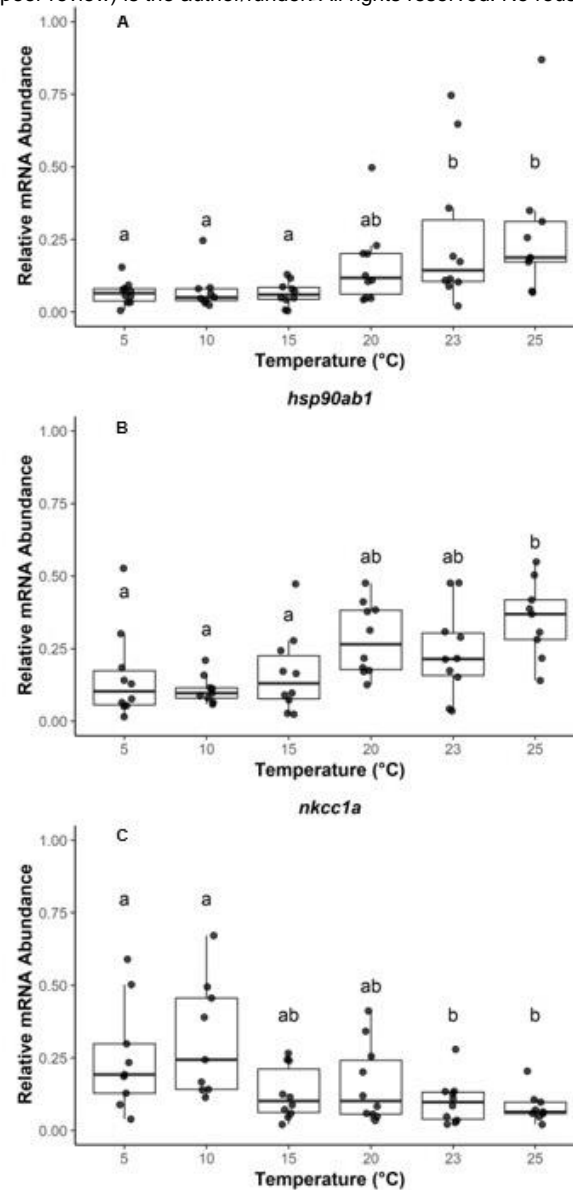

957 **Figure 1.** Transcript abundance of thermal stress biomarkers in gill tissue for juvenile brook  
958 trout (*Salvelinus fontinalis*) held at temperatures spanning their thermal distribution ( $n = 8-10$ ).  
959 Fish were held for 21 days at the respective acclimation temperature, with the exception of fish  
960 held at 25°C, where fish were sampled after 11 days (see text for details). Groups that do not  
961 share a letter are significantly different from one another (one-way ANOVA,  $P < 0.05$ ; see Table  
962 S2). Horizontal bars in the boxplot represent the median response value and the 75 and 25%  
963 quartiles. Whiskers represent  $\pm 1.5$  times the interquartile range, and each dot represents an  
964 individual response value. *gpx1*, glutathione peroxidase-like peroxiredoxin; *hsp90ab1*, heat  
965 shock protein 90-beta-1; *nkcc1a*,  $Na^+/K^+/2Cl^-$  co-transporter-1-a.

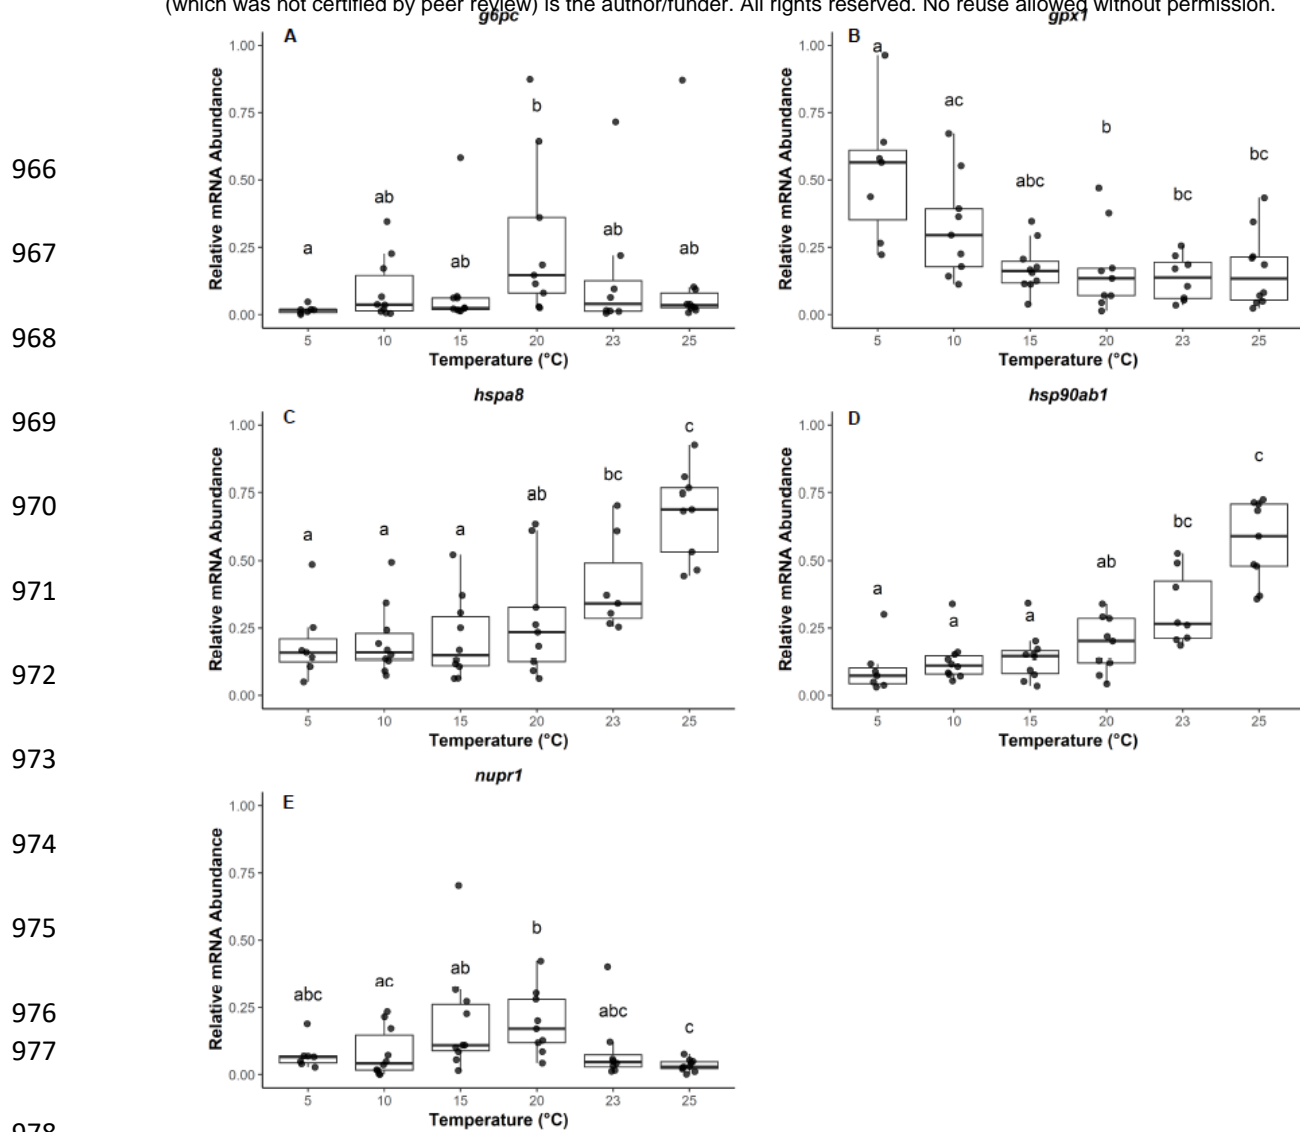

979 **Figure 2.** Transcript abundance of thermal stress biomarkers in liver tissue for juvenile brook  
980 trout (*Salvelinus fontinalis*) held at temperatures spanning their thermal distribution ( $n = 8-10$ ).  
981 Fish were held for 21 days at the respective acclimation temperature, with the exception of fish  
982 held at 25°C, where fish were sampled after 11 days (see text for details). Groups that do not  
983 share a letter are significantly different from one another (one-way ANOVA,  $P < 0.05$ ; see Table  
984 S2). Horizontal bars in the boxplot represent the median response value and the 75 and 25%  
985 quartiles. Whiskers represent  $\pm 1.5$  times the interquartile range, and each dot represents and  
986 individual response value. *g6pc*, glucose-6-phosphatase; *gpx1*, glutathione peroxidase-like  
987 peroxiredoxin; *hspa8*, heat shock cognate 71 kDa protein; *hsp90ab1*, heat shock protein 90-  
988 beta-1; *nupr1*, nuclear protein 1.

989  
990  
991  
992  
993  
994  
995  
996  
997  
998

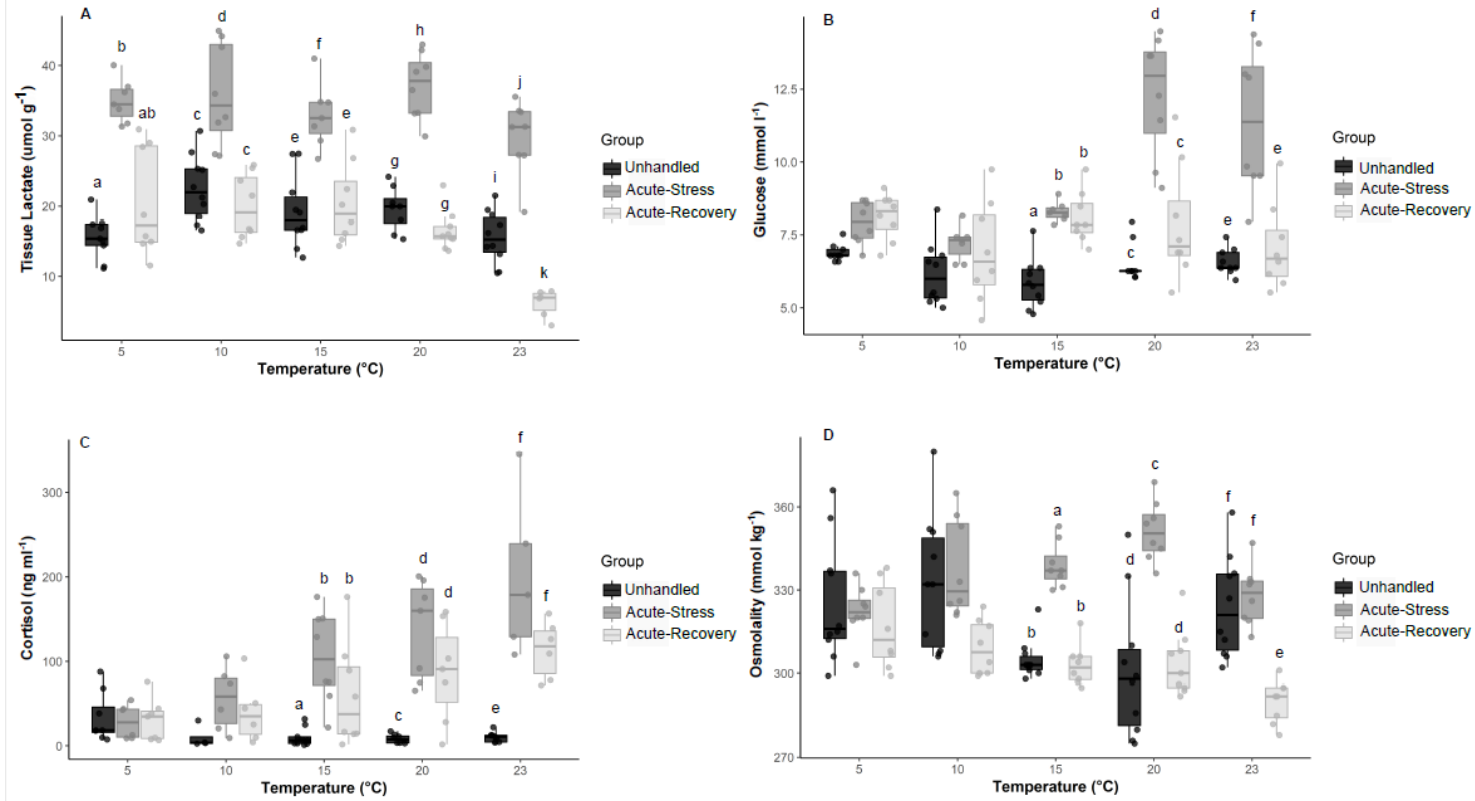

999 **Figure 3.** Physiological parameters collected from juvenile brook trout (*Salvelinus fontinalis*) held at temperatures spanning their  
1000 thermal distribution for 21 days. Muscle lactate (A), plasma glucose (B), plasma cortisol (C), and plasma osmolality (D) were  
1001 measured in fish directly sampled from the acclimation tank (unhandled;  $n = 10$ ), 30 min (acute-stress,  $n = 8$ ) and 24 h (acute-  
1002 recovery;  $n = 8$ ) after exposure to an acute stressor, consisting of 3 min of chasing and 5 min of air exposure. Within an acclimation  
1003 temperature, groups that do not share a letter are significantly different from one another. For muscle lactate, plasma glucose and  
1004 plasma cortisol, data were analyzed using a two-way ANOVA ( $P < 0.05$ ; see Table S3). Plasma osmolality was analyzed using a  
1005 glmm ( $P < 0.05$ ; see Table 2). Horizontal bars in the boxplot represent the median response value and the 75 and 25% quartiles.  
1006 Whiskers represent  $\pm 1.5$  times the interquartile range, and each dot represents an individual response value.



1007  
1008  
1009  
1010  
1011  
1012  
1013  
1014  
1015  
1016

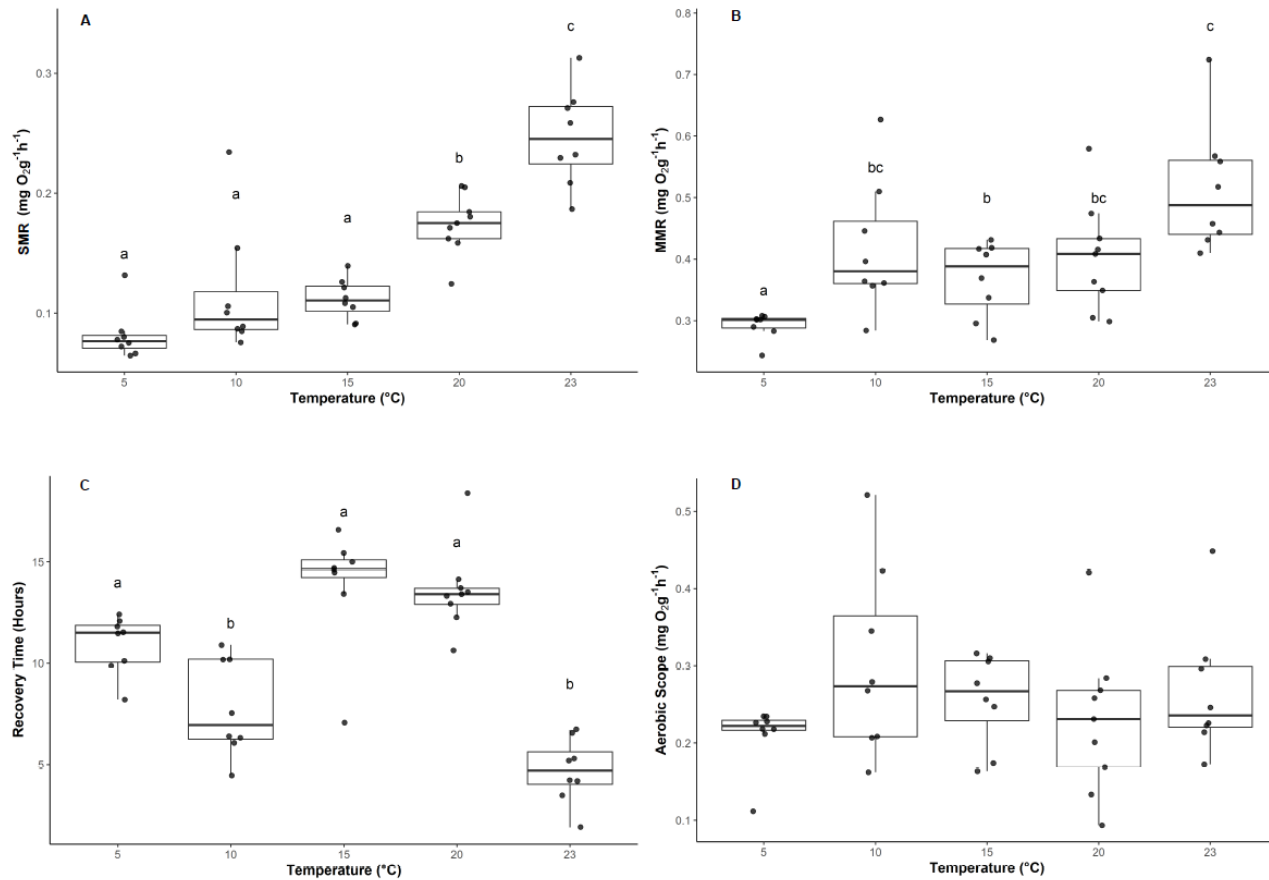

1017  
1018  
1019  
1020  
1021  
1022  
1023

**Figure 4.** Metabolic and recovery parameters collected from juvenile brook trout (*Salvelinus fontinalis*) held at temperatures spanning their thermal distribution ( $n = 8$ ). Standard metabolic rate (SMR; A), maximum metabolic rate (MMR; B), recovery time in hours post stress events (C), and aerobic scope (AS; D). Groups that do not share a letter are significantly different from one another (Kruskal-Wallis [SMR only], one-way ANOVA,  $P < 0.05$ ; see Table S3). Horizontal bars in the boxplot represent the median response value and the 75 and 25% quartiles. Whiskers represent  $\pm 1.5$  times the interquartile range, and each dot represents an individual response value.
